## **Formulation of Dry Powders of Vaccines Containing MF59 or AddaVax**

**by Thin-Film Freeze-Drying**

Khaled AboulFotouh<sup>1,5</sup>, Naoko Uno<sup>2</sup>, Haiyue Xu<sup>1</sup>, Chaeho Moon<sup>1</sup>, Sawittree Sahakijpijarn<sup>1</sup>, Dale J. Christensen<sup>3</sup>, Gregory J. Davenport<sup>3</sup>, Chris Cano<sup>3</sup>, Ted M Ross<sup>2,4\*</sup>, Robert O. Williams III<sup>1\*</sup>, Zhengrong Cui<sup>1\*</sup>

<sup>1</sup> Division of Molecular Pharmaceutics and Drug Delivery, College of Pharmacy, University of Texas at Austin, Austin, TX 78712, USA

<sup>2</sup> Center for Vaccines and Immunology, University of Georgia, Athens, GA 30605, USA

<sup>3</sup> TFF Pharmaceuticals, Inc., 2600 Via Fortuna, Suite 360, Austin, TX 78746, USA

<sup>4</sup> Department of Infectious Diseases, University of Georgia, Athens, GA 30602, USA

<sup>5</sup> Department of Pharmaceutics, Faculty of Pharmacy, Assiut University, Assiut 71526, Egypt

\* To whom correspondence shall be addressed:

ROW ([bill.williams@austin.utexas.edu](mailto:bill.williams@austin.utexas.edu)),

TMR ([tedross@uga.edu](mailto:tedross@uga.edu)),

or ZC ([zhengrong.cui@austin.utexas.edu](mailto:zhengrong.cui@austin.utexas.edu))

## Abstract

1 Oil-in-water (O/W) nanoemulsion-based vaccine adjuvants such as MF59<sup>®</sup> are often used in seasonal  
2 and pandemic influenza vaccines. However, vaccines containing nanoemulsions require cold chain for  
3 storage and are sensitive to accidental freezing. We explored the feasibility of developing dry powders  
4 of vaccines adjuvanted with MF59 or AddaVax<sup>™</sup>, a preclinical grade nanoemulsion that has the same  
5 composition and droplet size as MF59, by thin-film freeze-drying (TFFD). AddaVax alone was  
6 successfully converted from a liquid to dry powders by TFFD using trehalose as a stabilizing agent  
7 while maintaining the droplet size distribution of the AddaVax when reconstituted, whereas subjecting  
8 the same AddaVax composition to conventional shelf freeze-drying led to significant aggregation or  
9 fusion. TFFD was then applied to convert liquid AddaVax-adjuvanted vaccines containing either model  
10 antigens such as ovalbumin and lysozyme, mono-, bi-, and tri-valent recombinant hemagglutinin (rHA)  
11 protein-based H1 and/or H3 (universal) influenza vaccine candidates, as well as the MF59-containing  
12 Flud<sup>®</sup> Quadrivalent influenza vaccine to dry powders. Antigens, stabilizing agents, and buffer showed  
13 different effects on the physical properties of the vaccines (*e.g.*, mean particle size and particle size  
14 distribution) after subjected to TFFD, but the integrity and hemagglutination activity of the rHA  
15 antigens did not significantly change and the immunogenicity of reconstituted influenza vaccine  
16 candidates was preserved when evaluated in BALB/c mice. The vaccine dry powder was not sensitive  
17 to repeated freezing-and-thawing, in contrast to its liquid counterpart. It is concluded that TFFD can be  
18 applied to convert vaccines containing MF59 or an nanoemulsion with the same composition and  
19 droplet size as MF59 from liquid to dry powders while maintaining the immunogenicity of the vaccines,  
20 and it may be used to prepare dry powders of multivalent universal influenza vaccines.

## Keywords

Nanoemulsion; adjuvant; dry powder; freeze-drying; influenza; vaccine; immunogenicity; thermal analysis

## 21 1. Introduction

22 O/W nanoemulsion-based vaccine adjuvants such as MF59 and AS03 can increase and broaden  
23 the immune responses induced by vaccines and spare vaccine doses [1-3]. MF59 is a Novartis'  
24 proprietary vaccine adjuvant. It is a squalene oil (4.3% w/v) in citrate buffer nanoemulsion stabilized  
25 with Tween 80 (0.5% w/v) and Span 85 (0.5% w/v)), with a mean droplet size of 160 nm [4]. MF59 act  
26 by creating a transient immunocompetent environment locally at the site of injection with subsequent  
27 recruitment of key immune cells that transport the antigen and adjuvant to local lymph nodes where  
28 immune responses are induced [5]. The adjuvant effect of MF59 is maintained in conditions associated  
29 with CD4<sup>+</sup> T cell deficiency, which may explain its effectiveness in broad population and  
30 immunocompromised patients [4]. The immunostimulatory activity of MF59 is a property of the  
31 nanoemulsion; only the fully formulated MF59 nanoemulsion, not the individual components, can help  
32 activate immune responses [6]. Thus, the appropriate formulation composition and physical properties  
33 are crucial for MF59 to exert an adjuvant effect. AS03 has a composition and a mean droplet size like  
34 that of MF59; however, AS03 contains  $\alpha$ -tocopherol, in addition to squalene [7-9]. The presence of  $\alpha$ -  
35 tocopherol in AS03 is necessary for it to help induce high antibody titers [8].

36 MF59 is commonly used in seasonal and pandemic influenza vaccines [4]. It enhances the  
37 efficacy of these vaccines by eliciting hemagglutination inhibition antibodies as well as memory T and  
38 B cells against influenza viruses including antigenic “drift” and “shift” [10]. Examples of MF59-  
39 adjuvanted influenza vaccines include the AudenZ™ (an influenza A (H5N1) monovalent vaccine) and  
40 the Flud® Quadrivalent (an influenza vaccine against influenza virus subtypes A and B). MF59 was  
41 also used in pandemic H1N1 vaccines (*e.g.*, Arepanrix™, Celtura® and Focetria®) licensed in many  
42 countries during the 2009 H1N1 pandemic [4]. Additionally, MF59-adjuvanted vaccines against various  
43 other infections are currently in clinical trials (*clinicaltrials.gov*). AS03 is used in the FDA-approved  
44 influenza A (H5N1) monovalent vaccine manufactured by ID Biomedical Corporation of Quebec (QC,  
45 Canada). AS03 was also used in Pandemrix™ and Arepanrix™ that were approved during the influenza  
46 A (H1N1) pandemic in 2009, though the vaccines were removed from the markets after the pandemic  
47 [11].

48 Nanoemulsion-adjuvanted vaccines are marketed as injectables, either in pre-filled syringes or  
49 in single dose vials. They were also available in a multi-vial presentation, in which the antigens were  
50 supplied in separate vials from the nanoemulsion adjuvant, which should then be mixed together before  
51 use (*e.g.*, Pandemrix and Arepanrix). These vaccines require storage at 2-8°C and must not be frozen.  
52 Unintentional exposure to freezing temperatures can lead to a significant damage to the vaccines.  
53 Unfortunately, it was estimated that 75-100% of vaccines are exposed to freezing temperatures in  
54 various segments of the supply chain [12]. Converting vaccines from liquid to dry powders is a  
55 promising approach to enhance their freezing and thermal stability. Freeze-drying is commonly used  
56 for the development of dry powder formulations of biologics including vaccines [13, 14]. Freeze-drying

57 of vaccines containing O/W nanoemulsions is challenging, however, due to the sensitivity of  
58 nanoemulsions to the freezing and drying stress. Freezing of emulsions can result in phase separation,  
59 while dehydration can lead to interactions of surfactant molecules adsorbed on the oil droplets, which  
60 in turn adversely affects the emulsion stability and adjuvanticity [15, 16]. Nonetheless, there is evidence  
61 that it is possible to freeze-dry certain vaccine candidates that contain nanoemulsions [17]. For example,  
62 GLA-SE is a vaccine adjuvant currently under development. GLA-SE is composed of glucopyranosyl  
63 lipid A (GLA, a Toll-like receptor 4 (TLR-4) agonist) in squalene oil nanoemulsion (SE) [18]. A  
64 tuberculosis vaccine candidate comprised of ID93 antigen (*i.e.*, a recombinant fusion protein antigen  
65 consisting of four *Mycobacterium tuberculosis* proteins) and the GLA-SE adjuvant (*i.e.*, GLA-SE/ID93)  
66 was freeze-dried using D-trehalose and/or other disaccharides [18]. The mean hydrodynamic particle  
67 size of the GLA-SE/ID93 was about 80 nm and was increased by  $\geq 10$  nm after subjected to shelf freeze-  
68 drying and reconstitution [18, 19]. Vaccines containing MedImmune emulsions comprised of squalene  
69 oil, monophosphoryl lipid A or its synthetic analogue (PHAD), and Tween 80 exhibited a mean particle  
70 size increase from 70-90 nm to  $\sim 110$  nm or larger after subjected to shelf freeze-drying [15].  
71 Importantly, the immune responses induced by the freeze-dried vaccine candidates were not different  
72 from their liquid counterparts when evaluated in animal models [15, 18].

73 Unfortunately, GLA-SE and the MedImmune emulsions are different from MF59 and AS03 in  
74 composition and physical properties (*e.g.*, mean droplet size). Because the composition of  
75 nanoemulsion adjuvants is among the key factors that determine their susceptibility to drying [15], it  
76 remains unknown whether MF59, AS03, or nanoemulsions with the same or similar composition or  
77 droplet size as MF59 or AS03 and vaccines containing them can be converted to dry powders. The  
78 unique composition and physical properties of MF59 and AS03 may render them and vaccines  
79 containing them more sensitive to freezing and drying. For example, it was reported that nanoemulsions  
80 with smaller mean droplet size (*i.e.*,  $\sim 80$  nm) can be easily freeze-dried as compared to nanoemulsions  
81 with relatively larger mean droplet size (*i.e.*, 100-200 nm) [9]. The mean droplet size of GLA-SE and  
82 the MedImmune emulsions is  $\sim 80$  nm, but the mean droplet size of MF59 and AS03 is  $\sim 160$  nm.

83 The present study was designed to test the feasibility of applying TFFD to develop dry powders  
84 of AddaVax as well as vaccines containing AddaVax or MF59. AddaVax is preclinical grade  
85 nanoemulsion vaccine adjuvant with the same composition as MF59 (*i.e.*, squalene oil (5% v/v or 4.29%  
86 w/v based on squalene density of 0.858 (PubChem CID: 638072)), Tween 80 (0.5% w/v) and Span 85  
87 (0.5% w/v) in citrate buffer (10 mM, pH 6.5)) [20, 21]. AddaVax is for research use only. TFFD has  
88 been applied to successfully convert biologics, including vaccines, from liquid into stable dry powders  
89 [22-27]. It was hypothesized that the ultra-rapid freezing, relatively small gas-liquid interface, and low  
90 shear stress associated with the thin film freezing (TFF) process would minimize nanoemulsion droplet  
91 aggregation or fusion during the freezing step. We first tested the feasibility of thin-film freeze-drying  
92 AddaVax alone and then used ovalbumin (OVA) and lysozyme as model antigens to study the effect of

93 stabilizing agent, antigen, buffer molarity, as well as TFF temperature on the particle size distribution  
94 of vaccines after subjected to TFFD and reconstitution. Finally, we applied TFFD to the Fluvad  
95 Quadrivalent influenza virus vaccine that contains MF59 as well as mono-, bi-, and tri-valent (universal)  
96 influenza virus vaccine candidates containing H1 and/or H3 recombinant hemagglutinin (rHA) proteins  
97 and AddaVax. Although seasonal influenza occurs annually and seasonal flu vaccines are manufactured  
98 every year, the world is concerned about the threat of influenza pandemics [28], and there is an interest  
99 in developing universal flu vaccines. Our bivalent and trivalent influenza virus vaccine candidates can  
100 be considered universal flu vaccines. For universal flu vaccines, a shelf-life beyond the 6-9 months for  
101 seasonal flu vaccines is likely needed, and this need may be met by developing the vaccines into dry  
102 powders.

103

104

105

106

107

108

109

110

111

112

113

## 114 **2. Materials and Methods**

### 115 **2.1 Influenza HA antigens and viruses**

116 Two H3 (*i.e.*, TJ-5 and J-4) and one H1 (*i.e.*, Y-2) influenza virus rHA proteins were constructed  
117 using computationally optimized broadly reactive antigen (COBRA) methodology, a multiple-layered  
118 consensus building approach to design novel immunogens as vaccine candidates [29, 30]. The rHA  
119 proteins have a molecular weight of ~270 kDa and were expressed in HEK-293 cells and purified using  
120 IMAC Sepharose<sup>®</sup> High Performance resin (Sigma Aldrich, St. Louis, MO). Viruses were from the  
121 Influenza Reagents Resource (IRR) (Manassas, VA), BEI Resources (Manassas, VA), the Centers for  
122 Disease Control and Prevention (Atlanta, GA), or VIRAPUR, LLC (San Diego, CA, USA). Viruses  
123 were passaged once in the same growth conditions as they were received, in either embryonated chicken  
124 eggs or semi-confluent Madin-Darby Canine Kidney (MDCK) cell culture. H1N1 viruses used include  
125 A/Brisbane/02/2018, A/Michigan/45/2015, A/California/07/2009, A/Brisbane/59/2007, A/Solomon  
126 Islands/3/2006. H3N2 viruses used include A/South Australia/34/2019, A/Switzerland/8060/2017,  
127 A/Texas/71/2017, A/Kansas/14/2017, A/Singapore-IFNIMH-16-0019/2016, A/Hong Kong/4801/2014,  
128 A/Switzerland/9715293/2013, and A/Texas/50/2012.

129

### 130 **2.2 Preparation of AddaVax dry powders by TFFD and conventional shelf freeze-drying**

131 AddaVax (50  $\mu$ L, InvivoGen, San Diego, CA) was mixed with trehalose (Sigma-Aldrich) in  
132 citrate buffer (10 mM, pH 6.5) at a final sugar concentration of 30 mg/mL. The liquid AddaVax  
133 formulation was converted to a dry powder using either TFFD or conventional shelf freeze-drying.  
134 Thin-film freeze-dried powder was prepared as previously described [25]. Briefly, the liquid  
135 formulation (100  $\mu$ L) was dropped onto a cryogenically cooled stainless-steel surface (*i.e.*, cylindrical  
136 drum) having a temperature of -100 °C. The liquid droplets were rapidly spread and frozen to form thin  
137 films. Shelf freeze-dried powder was prepared by gradually cooling 0.5 mL of the liquid AddaVax  
138 formulation containing trehalose at a concentration of 30 mg/mL from room temperature ( $\sim 21 \pm 2^\circ\text{C}$ )  
139 to -40°C at a cooling rate of about 2°C/min. The frozen liquid was maintained at -40°C for 1 h in the  
140 lyophilizer prior to lyophilization. Frozen thin-films prepared by TFFD and frozen liquid prepared by  
141 conventional shelf freezing were subsequently lyophilized using an SP VirTis AdVantage Pro Freeze  
142 Dryer with Intellitronics Controller (SP Scientific, Stone Ridge, NY). Lyophilization was performed  
143 over about 50 h at pressures  $\leq 100$  mTorr. The shelf temperature was maintained at -35°C for 30 h and  
144 then gradually ramped to +20°C throughout ~16 h. During the secondary drying phase, the vials were  
145 kept at +20°C for 4 h. Vials were stoppered in nitrogen gas at 100 mTorr, sealed using aluminum caps,  
146 and then stored in a vacuum desiccator at room temperature until analysis. Reconstitution was  
147 performed by adding 100  $\mu$ L of milli-Q water. Reconstituted AddaVax formulations were diluted 20-  
148 fold with milli-Q water before droplet size measurements. Z-average hydrodynamic droplet size  
149 distribution was determined by dynamic light scattering (DLS) using a Malvern Zeta Sizer Nano ZS  
150 (Worcestershire, UK).

151 **2.3 Effect of antigen, stabilizing agent, buffer molarity, freezing method, and TFF**  
152 **temperature on the particle size distribution of AddaVax-adjuvanted vaccines using OVA and**  
153 **lysozyme as model antigens**

154 AddaVax-adjuvanted OVA model vaccine (AddaVax/OVA) formulations containing AddaVax  
155 (50  $\mu\text{L}$ ), OVA (6  $\mu\text{g}$ , Sigma-Aldrich) and a stabilizing agent selected from sucrose (Merck KGaA,  
156 Darmstadt, Germany), D-mannitol and D-trehalose dihydrate (Sigma-Aldrich) at a concentration  
157 between 50 and 500 mg/mL were prepared by simple mixing (**Table 1**). Vaccine formulations (100  $\mu\text{L}$ )  
158 were subjected to TFFD as described above and hydrodynamic particle size distribution in the  
159 formulations was measured after reconstitution and dilution with milli-Q water. All formulations were  
160 in citrate buffer (pH 6.5) and frozen into thin-films at  $-100^\circ\text{C}$ .

161

162 **Table 1.** Compositions of vaccine formulations prepared to investigate the effect of stabilizing agent  
163 and stabilizing agent concentration on the particle size distribution of AddaVax/OVA vaccine subjected  
164 to TFFD and reconstitution.

| Stabilizing agent   |                          |               | Citrate buffer<br>molarity<br>(mM) |
|---------------------|--------------------------|---------------|------------------------------------|
| Sugar/sugar alcohol | Concentration<br>(mg/mL) | Mass fraction |                                    |
| Sucrose             | 50                       | 0.51          | 2.5                                |
| Sucrose             | 100                      | 0.67          |                                    |
| Mannitol            | 50                       | 0.51          |                                    |
| Mannitol            | 100                      | 0.67          |                                    |
| Trehalose           | 100                      | 0.67          |                                    |
| Trehalose           | 50                       | 0.44          |                                    |
| Trehalose           | 100                      | 0.61          | 5                                  |
| Trehalose           | 125                      | 0.66          |                                    |
| Trehalose           | 250                      | 0.80          |                                    |
| Trehalose           | 500                      | 0.87          |                                    |

165

166 To study the effect of drying technology, freezing rate and repeated freezing, and thawing on  
167 the particle size of AddaVax/OVA vaccine, liquid formulation of AddaVax/OVA vaccine having the  
168 same composition of that subjected to TFFD (*i.e.*, AddaVax (50  $\mu\text{L}$ ), OVA (6  $\mu\text{g}$ ) and trehalose (125  
169 mg/mL in citrate buffer (2.5 mM, pH 6.5)) was converted to dry powder using shelf freeze-drying as  
170 described above. The effect of TFF and shelf freezing on mean particle size of AddaVax/OVA vaccine  
171 was also investigated. Frozen thin-films prepared by dropping 100  $\mu\text{L}$  of liquid vaccine formulation on  
172 a cryogenically cooled drum having a temperature of  $-100^\circ\text{C}$  and frozen formulation prepared by shelf  
173 freezing (*i.e.*, cooling 0.5 mL of the liquid vaccine formulation from room temperature ( $\sim 21 \pm 2^\circ\text{C}$ ) to  
174  $-40^\circ\text{C}$  at a cooling rate of  $\sim -2^\circ\text{C}/\text{min}$ ) were thaw at  $4^\circ\text{C}$  for 1 h. Formulations were adequately diluted

175 in milli-Q water before determining their Z-average hydrodynamic particle size by DLS. The effect of  
 176 repeated freezing and thawing on the mean particle size of liquid AddaVax/OVA formulation and its  
 177 thin-film freeze-dried powder counterpart was also investigated. Liquid formulation (0.5 mL) and dry  
 178 powder were subjected to three consecutive cycles of freezing at -20 °C for 8 h and thawing at 4 °C for  
 179 16 h. At the end of the third cycle, the powder was reconstituted and adequately diluted with milli-Q  
 180 water and Z-average hydrodynamic particle size was determined by DLS.

181 **Table 2** shows the composition of various vaccine formulations prepared to investigate the  
 182 effect of TFF temperature (*i.e.*, the temperature of the cryogenically cooled drum surface), the antigen,  
 183 antigen amount and buffer molarity on the Z-average hydrodynamic particle size of AddaVax/OVA  
 184 vaccine after subjected to TFFD and reconstitution. All formulations comprised 50  $\mu$ L of AddaVax and  
 185 trehalose at a concentration of 125 mg/mL and were frozen into thin-films at a drum temperature of -  
 186 100°C. Relevant samples (**Table 2**) were also frozen into thin-films at drum temperatures of -50°C and  
 187 -180°C to study the influence of TFF temperature on the Z-average hydrodynamic particle size of the  
 188 model vaccine. Frozen vaccine thin-films were lyophilized and the particle size distribution upon  
 189 reconstitution was determined as described above.

190

191 **Table 2.** Compositions of vaccine formulations prepared to investigate the effect of TFF temperature,  
 192 antigen, antigen amount and buffer molarity on particle size distribution of AddaVax-adjuvanted model  
 193 vaccines subjected to TFFD and reconstitution.

| Studied parameter            | Antigen ( $\mu$ g) |          | Molarity of citrate buffer<br>(pH 6.5) | Drum (TFF) temperature<br>(°C) |
|------------------------------|--------------------|----------|----------------------------------------|--------------------------------|
|                              | OVA                | Lysozyme |                                        |                                |
| TFF temperature              | 6                  | -        | 2.5 mM                                 | -50                            |
|                              |                    |          |                                        | -100                           |
|                              |                    |          |                                        | -180                           |
| Antigen or antigen<br>amount | -                  | 12       | 2.5 mM                                 | -100                           |
|                              | 12                 | -        |                                        |                                |
|                              | 50                 | -        |                                        |                                |
| Buffer molarity              | 6                  | -        | 5 mM                                   | -100                           |
|                              | 6                  | -        |                                        |                                |
|                              | 6                  | -        |                                        |                                |

194

195 **2.4 Characterization of AddaVax/OVA dry powders**



196 Thermal analysis of AddaVax/OVA powder prepared using the TFFD technology was  
197 performed using a differential scanning calorimeter Model Q20 (TA Instruments Inc., New Castle, DE)  
198 equipped with a refrigerated cooling system (RCS40, TA Instruments Inc.). Samples were first cooled  
199 down to -40°C at a ramp rate of 10°C/min, then ramped from -40°C to 300°C at a heating ramp rate of  
200 5°C/min. Data were processed by TA Instruments Trios V.5.1.1.46572 software. Powder crystallinity  
201 was evaluated using a Rigaku Oxford Diffraction HyPix6000E Dual Source diffractometer (Tokyo,  
202 Japan) using a  $\mu$ -focus sealed tube Cu K $\alpha$  radiation source ( $\lambda = 1.5418\text{\AA}$ ) with collimating mirror  
203 monochromators. The instrument was operated at an accelerating voltage of 50 kV at 0.8 mA. The data  
204 were collected at 100 K using an Oxford Cryostream low temperature device (Oxford Cryosystems Ltd,  
205 Oxford, United Kingdom). A continuous  $\phi$  rotation of the sample was maintained for each of three  
206 different orientations of the sample for 100 seconds for each frame. The three frames collected on the  
207 2-dimensional detector were combined to generate a 1-dimensional powder pattern. The data collection  
208 and data reduction were performed using Rigaku Oxford Diffraction's CrysAlisPro V 1.171.42.25a.  
209 Residual water content in the vaccine powder was quantified by volumetric Karl Fischer titration using  
210 a Mettler Toledo V20 titrator (Mettler Toledo, Columbus, OH).

211

## 212 **2.5 Preparation of AddaVax-adjuvanted influenza vaccine powders and Flud Quadrivalent dry** 213 **powder using TFFD**

214 Four influenza vaccine formulations were prepared by mixing one or more rHA proteins at a  
215 total amount of 6  $\mu\text{g}$  with 50  $\mu\text{L}$  of AddaVax (**Table 3**). Trehalose in citrate buffer (2.5 mM, pH 6.5)  
216 was employed as a stabilizing agent at a concentration of 125 mg/mL. Formulations (100  $\mu\text{L}$ ) were thin-  
217 film frozen at -100°C and lyophilized as described above. Flud Quadrivalent vaccine was donated by  
218 HEB Pharmacy with approval of the Texas State Board of Pharmacy. Flud Quadrivalent vaccine  
219 contains MF59 and the HA proteins of four influenza strains at 15  $\mu\text{g}$  per 0.5 mL each. Trehalose  
220 dissolved in citrate buffer (2.5 mM, pH 6.5) (50  $\mu\text{L}$ ) was mixed with 50  $\mu\text{L}$  of the Flud Quadrivalent  
221 vaccine to reach a final trehalose concentration of 125 mg/mL. The resultant liquid Flud Quadrivalent  
222 vaccine formulation was then frozen to thin-films at -100°C and dried as described above.

223

224 **Table 3.** Compositions of AddaVax-adjuvanted monovalent, bivalent, and trivalent influenza virus  
225 vaccines.

| 226<br>227<br>228<br>229<br>230<br>231<br>Vaccine candidate | AddaVax<br>( $\mu\text{L}$ ) | rHA antigen(s) ( $\mu\text{g}$ ) |     |      |
|-------------------------------------------------------------|------------------------------|----------------------------------|-----|------|
|                                                             |                              | Y-2                              | J-4 | TJ-5 |
| AddaVax/Y-2                                                 | 50                           | 6                                | -   | -    |
| AddaVax/J-4                                                 | 50                           | -                                | 6   | -    |
| AddaVax/Y-2/J-4                                             | 50                           | 3                                | 3   | -    |
| AddaVax/Y-2/J-4/TJ-5                                        | 50                           | 2                                | 2   | 2    |

## 232 **2.6 Characterization of AddaVax-adjuvanted influenza vaccine and Flud Quadrivalent vaccine** 233 **powders**

234 Thin-film freeze-dried vaccine powders were reconstituted in milli-Q water, and particle size  
235 distribution, polydispersity index (PDI) and zeta potential values were measured using a Malvern Zeta  
236 Sizer Nano ZS after dilution with milli-Q water. The integrity of HA proteins was investigated using  
237 SDS-PAGE analysis. Samples for SDS-PAGE analysis and hemagglutination assay were reconstituted  
238 in 50  $\mu$ L milli-Q water so that the HA content is 6  $\mu$ g/50  $\mu$ L to facilitate the analysis. Briefly, 10  $\mu$ L of  
239 reconstituted representative influenza vaccine (*i.e.*, AddaVax/Y-2) of Flud Quadrivalent was mixed  
240 with Laemli Sample Buffer (Bio-Rad, Hercules, CA) and  $\beta$ -mercaptoethanol (2%, *v/v*, Sigma-  
241 Aldrich). Samples were heated at 95°C for 5 min prior to loading onto 4-20% Mini-PROTEAN®  
242 TGX™ precast polyacrylamide gel (Bio-Rad). Gel electrophoresis was done at 100 V for 90 min. Gel  
243 was stained in a Bio-Safe™ Coomassie G-250 Stain (Bio-Rad).

244 The integrity of the HA proteins in the TFFD powders was evaluated using a standard  
245 hemagglutination assay using chicken red blood erythrocytes as previously described [31]. Briefly,  
246 vaccine powders were reconstituted in water, and then 50  $\mu$ L sample was 2-fold serially diluted using  
247 phosphate buffered saline (PBS, 10 mM, pH 7.2) in U-bottom 96-well plates. The samples were then  
248 incubated with 50  $\mu$ L of 1% chicken erythrocyte suspension (Rockland Immunochemicals, Inc.,  
249 Limerick, PA) in PBS at room temperature for 30 min. Hemagglutination titers were reported as the  
250 reciprocal of the last dilution where hemagglutination was observed (*i.e.*, absence of chicken  
251 erythrocyte precipitation) and were expressed in hemagglutination units (HAUs)/50  $\mu$ L.

252

## 253 **2.7 Animal studies**

254 Female BALB/c mice (6 to 8 weeks old) were from Jackson Laboratory (Bar Harbor, ME) and  
255 housed in microisolator units. The mice were allowed free access to food and water and were cared for  
256 under USDA Guidelines for Laboratory Animals. All procedures were reviewed and approved by the  
257 Institutional Animal Care and Use Committee at the University of Georgia. Mice (10 per group) were  
258 intramuscularly injected twice, four-weeks apart, with different influenza virus vaccine formulations at  
259 a dose that contained 3  $\mu$ g rHA protein(s) per mouse (**Table 4**). Mice were bled in weeks 0, 4 and 8.  
260 For viral challenge, mice were briefly anesthetized and infected with 50  $\mu$ L A/Kansas/14/2017 H3N2  
261 intranasally ( $5 \times 10^6$  PFU). Mice were monitored for weight loss and euthanized 14 days after challenge.  
262 Weight loss more than 25% was used as a primary measurement for determination of humane endpoint.  
263 Also, dyspnea, lethargy, response to external stimuli and other respiratory distress was closely  
264 monitored for the determination of humane endpoint.

265

266

267

268 **Table 4.** Animal study design.

| Group | Treatment            |                |                   |          |
|-------|----------------------|----------------|-------------------|----------|
|       | Vaccine              | Physical form  | rHA antigen(s)    | Adjuvant |
| I     | AddaVax/Y-2          | Powder         | Y-2               | AddaVax  |
| II    | AddaVax/J-4          | Powder         | J-4               | AddaVax  |
| III   | AddaVax/Y-2/J-4      | Powder         | Y-2 and J-4       | AddaVax  |
| IV    | AddaVax/Y-2/J-4/TJ-5 | Powder         | Y-2, J-4 and TJ-5 | AddaVax  |
| V     | Control              | Powder         | None              | AddaVax  |
| VI    | Control              | Liquid         | Y-2, J-4 and TJ-5 | AddaVax  |
| VII   | Control              | Liquid         | Y-2               | AddaVax  |
| VIII  | Mock                 | Not applicable | None              | None     |

269

## 270 **2.8 Hemagglutination inhibition assay**

271 The hemagglutination inhibition (HAI) assay was used to assess the ability of anti-rHA protein  
 272 antibodies to inhibit hemagglutination of erythrocytes by a panel of H1N1 and H3N2 viruses. The  
 273 protocols were adapted from the WHO laboratory influenza surveillance manual [32]. Briefly, sera from  
 274 mice 4 weeks after boost immunization were treated with receptor-destroying enzyme (RDE) (Denka  
 275 Seiken, Japan) to inactivate nonspecific inhibitors. RDE was added 3:1, w/v, to sera and incubated 18 h  
 276 at 37°C. RDE was then inactivated by incubation at 56°C for 45 min. RDE-treated sera were brought  
 277 up to a final 1:10 mixture in PBS and then diluted in 2-fold serially in V-bottom microtiter plates. An  
 278 equal volume of virus, adjusted to 8 HAUs/50  $\mu$ L, was added to each well. H3N2 virus was adjusted  
 279 with 20 nM Oseltamivir. After 20 min incubation, 0.8% erythrocytes in PBS were added (Lampire  
 280 Biologicals, Piperville, PA). For H1N1, turkey erythrocytes were used. For H3N2, guinea pig  
 281 erythrocytes in presence 20 nM Oseltamivir were used.

282

## 283 **2.9 Focus reduction assay**

284 Focus Reduction Assay (FRA) was used to assess the ability of polyclonal sera from vaccinated  
 285 mice to neutralize H1N1 and H3N2 viruses *in vitro* as previously described [33]. Briefly, MDCK-  
 286 SIAT1 cells were plated at  $5 \times 10^4$  cells per well in a 96-well plate in media (DMEM containing 5%  
 287 heat-inactivated fetal bovine serum and penicillin-streptomycin). RDE-treated mouse sera were serially  
 288 diluted 2-fold starting at 1:20 dilution in virus growth medium (DMEM containing 0.1% BSA,  
 289 penicillin-streptomycin, and 1  $\mu$ g/mL TPCK-treated trypsin). Sera (50  $\mu$ L) was added to the cell  
 290 monolayers. Afterward, 50  $\mu$ L of virus (600 focus forming units (FFU)/50  $\mu$ L) were added and the  
 291 plates were incubated for 2 h at 37°C with 5% CO<sub>2</sub>. The cells were overlaid with 1.2% Avicel (FMC  
 292 Health and Nutrition, Philadelphia, PA) in 2 $\times$  modified Eagle medium containing 0.1% BSA, penicillin-  
 293 streptomycin, and 1  $\mu$ g/mL TPCK-treated trypsin. Plates were incubated for 24 h at 37°C with 5% CO<sub>2</sub>.

294 The overlays were removed and the cell monolayers washed with PBS to remove any residual Avicel.  
295 The plates were fixed with 4% formalin and cells were permeablized with 0.5% Triton X-100 in  
296 PBS/glycine. The plates were washed with PBS containing 0.1% Tween 20 and incubated for 1 h at  
297 room temperature with a monoclonal antibody against influenza virus A or B nucleoprotein from The  
298 IRR. After washing three times, the cells were incubated with goat anti-mouse peroxidase labeled IgG  
299 (474-1802; SeraCare, Inc, Milford, MA) for 1 h at room temperature. The plates were washed three  
300 times and infectious foci were visualized by adding TrueBlue substrate (SeraCare) containing 0.03%  
301 H<sub>2</sub>O<sub>2</sub> to the cells for 10 min at room temperature. The reaction was stopped by washing with distilled  
302 water five times. The foci were counted using a BioSpot analyzer with ImmunoCapture 6.4.87 software  
303 (CTL, Shaker Heights, OH). The virus control well containing no sera was used for comparison of focus  
304 reduction.

305

## 306 **2.10 Statistical analysis**

307 Student's t-test or One-way ANOVA followed by Tukey's or Dunnet multiple comparison test  
308 were performed using GraphPad Prism version 8.0.0 for Windows (GraphPad Software, San Diego,  
309 CA). Differences were deemed significant if  $p \leq 0.05$ .

310

311

312

313

314

315

316

317

318

319

320

321

322

323

324

325

326

327

328

329

### 330 3. Results and discussion

#### 331 3.1. Thin-film freeze-drying of AddaVax adjuvant

332 O/W nanoemulsions such as MF59 are vaccine adjuvants that can elicit robust antibody and  
333 cellular immune responses. O/W nanoemulsion-adjuvanted vaccines are freeze-sensitive. Formulating  
334 these vaccines as dry powders can potentially address their freezing sensitivity. Initially, we tested the  
335 applicability of TFFD technology for converting AddaVax, a preclinical grade equivalent of MF59, into  
336 a dry powder without adversely affecting its droplet size and size distribution. Our previous work  
337 showed that trehalose at low concentration can protect lipid-based vaccine adjuvants (*e.g.*, liposomes)  
338 against freezing and/or drying-induced particle aggregation (unpublished data). Thus, liquid AddaVax  
339 formulation containing trehalose at a concentration of 30 mg/mL in citrate buffer (10 mM, pH 6.5) was  
340 frozen into thin films at a temperature of -100°C followed by lyophilization. The same formulation was  
341 also converted to dry powder by standard shelf freeze-drying as a control. Approved seasonal and  
342 pandemic influenza vaccines comprise either AS03 or MF59 adjuvant equivalent to 10.69 mg or 9.75  
343 mg of squalene oil, respectively, per 0.5 mL dose. In this study, the formulation contained 50  $\mu$ L of  
344 AddaVax per 100  $\mu$ L, which is equivalent to 10.7 mg squalene oil per 0.5 mL.

345 Dry powders of AddaVax prepared by TFFD or conventional shelf freeze-drying were  
346 reconstituted in water and mean droplet size of the nanoemulsion was determined by DLS. The droplet  
347 size is among the key quality attributes of nanoemulsion vaccine adjuvants [15]. It can affect both the  
348 nanoemulsion's stability and adjuvanticity [15]. Thus, maintaining the integrity and size uniformity of  
349 nanoemulsion droplets in the dry powders is critical. As depicted in **Figure 1A**, the mean droplet size  
350 of AddaVax nanoemulsion did not significantly changed after it was converted to a dry powder using  
351 TFFD and reconstituted in water. On the contrary, shelf freeze-drying had a deleterious effect on the  
352 particle size distribution of AddaVax nanoemulsion, leading to significant particle aggregation or fusion  
353 as demonstrated by the extra groups of particulates or droplets in the range of 1  $\mu$ m and 5  $\mu$ m (**Figure**  
354 **1B**). Thus, the Z-average mean droplet size of AddaVax in the dry powder prepared using shelf freeze-  
355 drying was significantly increased. Since the frozen thin-films prepared by TFF and the frozen liquid  
356 prepared by shelf freezing were dried using the same lyophilization cycle, the observed different effects  
357 of these dry powder engineering technologies on the nanoemulsion droplet size can be attributed to the  
358 freezing step.

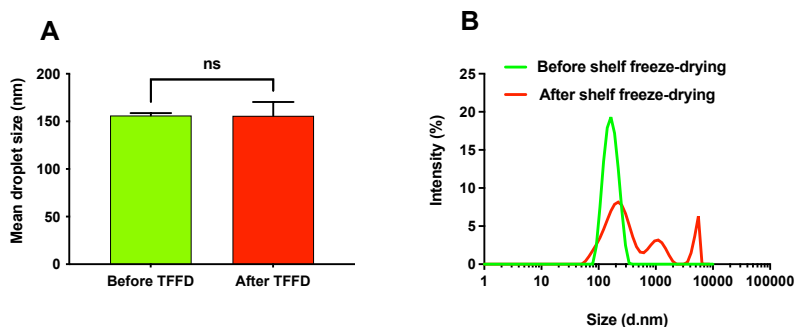

359

360 **Figure 1.** Effect of TFFD and shelf freeze-drying on AddaVax droplet size. (A) Mean droplet size of  
361 AddaVax after TFFD and reconstitution in water as compared to the liquid adjuvant (*i.e.*, before TFFD).  
362 (B) Droplet size distribution of reconstituted AddaVax dry powder prepared using conventional shelf  
363 freeze-drying as compared to the liquid AddaVax before subjected to shelf freeze-drying. *ns*: non-  
364 significant ( $p>0.05$ ).

### 365 **3.2. Thin-film freeze-drying of AddaVax-adjuvanted vaccines using OVA or lysozyme as model** 366 **antigens**

#### 367 **3.2.1. Effect of stabilizers**

368 AddaVax was successfully converted to dry powder using TFFD technology without a  
369 significant effect on mean droplet size and size distribution of the nanoemulsion after reconstitution.  
370 Then, the applicability of TFFD for converting AddaVax-adjuvanted vaccines into dry powders was  
371 investigated using sucrose, trehalose or mannitol as a stabilizing agent at a concentration of 100 mg/mL  
372 and OVA (6  $\mu$ g) as a model antigen. Appropriate stabilizing excipient(s) must be incorporated in the  
373 formulation in order to protect the nanoemulsion droplets against possible freezing and/or the drying-  
374 induced stresses [14, 22]. All excipients have helped to maintain AddaVax/OVA vaccine's  
375 monodispersed particle size distribution after TFFD and reconstitution (**Figure 1S**); however, the  
376 vaccine's mean particle size was increased (**Figure 2A**). Sucrose was more effective in maintaining the  
377 vaccine mean particle size after TFFD than trehalose ( $p<0.05$ ) or mannitol ( $p<0.0001$ ). Sucrose as a  
378 stabilizing excipient has resulted in a particle size increase by  $42 \pm 9$  nm (*i.e.*, 26%) after TFFD. When  
379 trehalose or mannitol was used as a stabilizing excipient at the same concentration level, the mean  
380 particle size increased by  $63 \pm 6$  nm or  $101 \pm 4$ , respectively. This is in agreement with a previous report  
381 that sucrose was more effective than trehalose and mannitol in preserving the particle size of GLA-  
382 SE/ID93 vaccine after freeze-drying [19].

383 In addition to the identity of the stabilizing agent, its concentration in the formulation is also  
384 critical [34]. Thus, the stabilizing effect of various stabilizing agents at different concentrations on the  
385 vaccine particle size was investigated (**Figure 2B-F**). Overall, it appeared that sucrose or trehalose at

386 100 or 125 mg/mL was most effective in minimizing the increase in the particle size of the  
387 AddaVax/OVA vaccine upon TFFD and reconstitution. Mannitol was less effective, likely because  
388 mannitol crystallizes during freezing [35]. Trehalose at 100 or 125 mg/mL was also effective, but not  
389 as effective as sucrose. It was noted that trehalose at 250 mg/mL and 500 mg/mL resulted in bimodal  
390 particle size distribution in the reconstituted model vaccine (*i.e.*, large aggregates with mean droplet  
391 size >1 $\mu$ m were observed) (**Figure 2E-F**). Generally, the higher the concentration of the stabilizing  
392 agent, the better its stabilizing effect. However, dispersion destabilization can be induced when the  
393 excipient's concentration required for optimal stability is exceeded [36].

394 Formulations containing various stabilizers at a concentration of 50 mg/mL were selected to  
395 investigate the crystallinity of their powders because they showed a clear distinction in their Z-average  
396 hydrodynamic particle size (**Figure 2B-D**). As depicted in **Figure 3A**, TFF of vaccine formulation  
397 containing  $\beta$ -D-mannitol at a concentration of 50 mg/mL resulted in the crystallization of  $\beta$ -D-mannitol  
398 mainly in the  $\delta$  and  $\alpha$  polymorphs with the  $\delta$  polymorph dominating. Our previous work showed also  
399 that mannitol crystallizes during TFF in the  $\alpha$  polymorph [24] or  $\beta$  and  $\delta$  polymorphs [37]. The  
400 distribution of mannitol crystal forms depends on the formulation composition as well as the freezing  
401 and drying conditions [38]. For instance, in this study  $\beta$ -D-mannitol solution in water (50 mg/mL)  
402 crystallized in  $\beta$  and  $\alpha$  polymorphs (data not shown). On the other hand, AddaVax/OVA powders  
403 containing either sucrose or trehalose were amorphous (**Figure 3A**). To be effective in protecting  
404 nanoemulsions against freezing and/or drying stress, stabilizing agents must retain amorphous  
405 structures during the freezing and drying steps [39, 40]. For instance, crystalline lyophilisate was  
406 reported to increase the mean particle size of GLA-SE after reconstitution [19], possibly due to  
407 destabilization of the nanoemulsion's membrane [41]. It is noteworthy that mannitol at low  
408 concentration (*i.e.*, 0-1% w/v) promotes the formation of amorphous lyophilisate [19]; however, in this  
409 study mannitol at low concentrations was ineffective as a stabilizing agent. Consequently, mannitol was  
410 excluded from further investigations. Sucrose is a non-crystallizing sugar [42] that remains amorphous  
411 after TFFD and thus can maintain the integrity of the nanoemulsion's droplets. Trehalose crystallizes  
412 as trehalose dihydrate during the freezing step, which in turn undergoes dehydration to amorphous  
413 anhydrate during the drying step [39]. Crystallization of trehalose during the freezing step can justify  
414 its relatively lower efficiency as a stabilizing excipient as compared to the non-crystallizing sucrose  
415 (**Figure 2**).

416 As mentioned above, sucrose and trehalose were both effective when they were incorporated  
417 in the AddaVax/OVA formulation at a concentration of 100 mg/mL or 125 mg/mL. Sucrose is more  
418 hygroscopic than trehalose [43]. Water sorption by sucrose-based dry powders can deteriorate their  
419 physical properties [14, 22, 44]. As shown in **Figure 3B**, the glass transition temperature ( $T_g$ ) of  
420 AddaVax/OVA model vaccine containing trehalose or sucrose as a stabilizing excipient was 123°C

421 and 19°C, respectively. The observed  $T_g$  of amorphous sucrose is lower than the reported values (*i.e.*,  
422 52-79°C) [45], which could be due to the relatively high residual water content in the vaccine dry  
423 powder (~5%). Thus, trehalose can be more effective than sucrose in long-term stabilization of vaccine  
424 powder due to its high  $T_g$  [40]. Furthermore, trehalose can slow the crystallization of low  $T_g$   
425 formulations to an extent that they can be stored at ambient temperatures [45]. The  $T_g$  of the developed  
426 vaccine powder comprising trehalose as a stabilizer is sufficiently higher than room temperature and  
427 thus, the powder has the potential to be stored in ambient temperatures [22]. Therefore, the vaccine  
428 formulation comprising AddaVax (50  $\mu$ L), OVA (6  $\mu$ g), and trehalose (125 mg/mL) in citrate buffer  
429 (2.5 mM, pH 6.5) was selected for further investigations unless otherwise described.

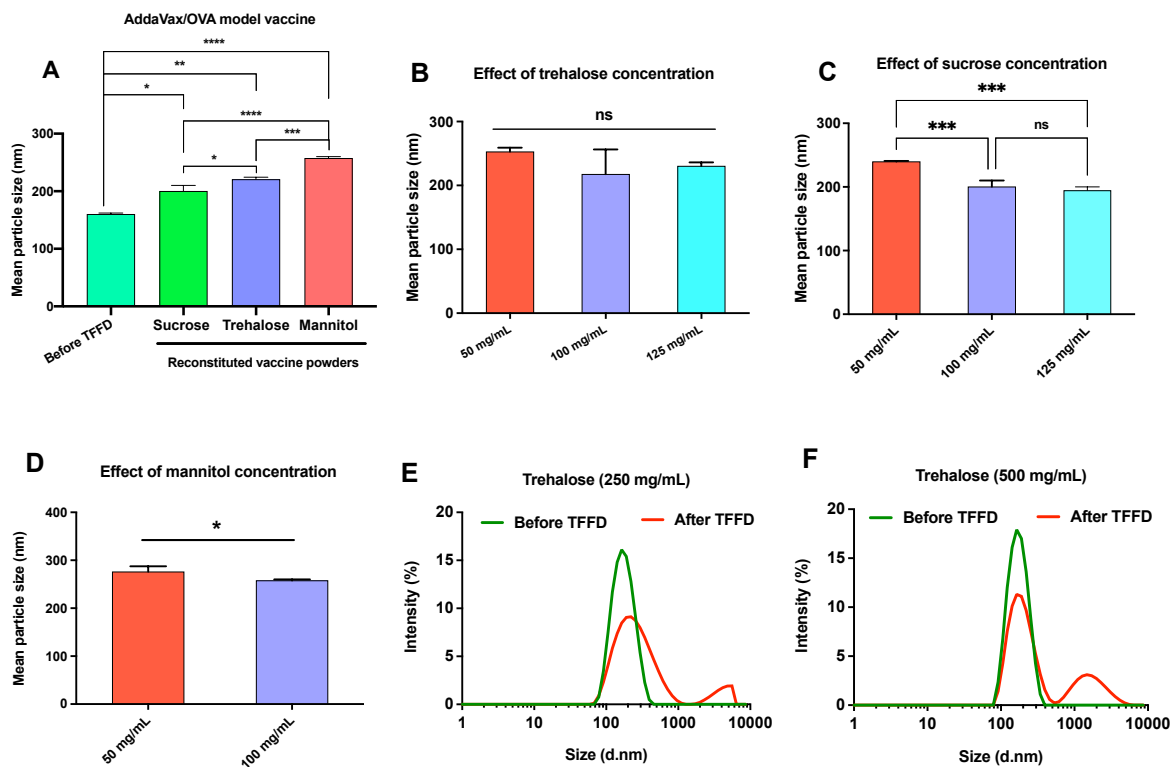

430

431 **Figure 2.** Effect of stabilizing agent and its concentration on mean particle size of AddaVax/OVA  
432 model vaccine. (A) The efficiency of sucrose, trehalose and mannitol in terms of maintaining the  
433 vaccine mean particle size after TFFD and reconstitution was investigated at sugar/sugar alcohol  
434 concentration of 100 mg/mL. Liquid vaccine formulations (*i.e.*, before TFFD) comprising different  
435 stabilizing agents at 100 mg/mL showed similar mean droplet size. (B-F) Effect of stabilizing agent  
436 concentration on the mean particle size of AddaVax/OVA powder prepared using TFFD after  
437 reconstitution in water. \* $p < 0.05$ , \*\* $p < 0.01$ , \*\*\* $p < 0.001$ , \*\*\*\* $p < 0.0001$ , ns: non-significant ( $p > 0.05$ ).

438

439



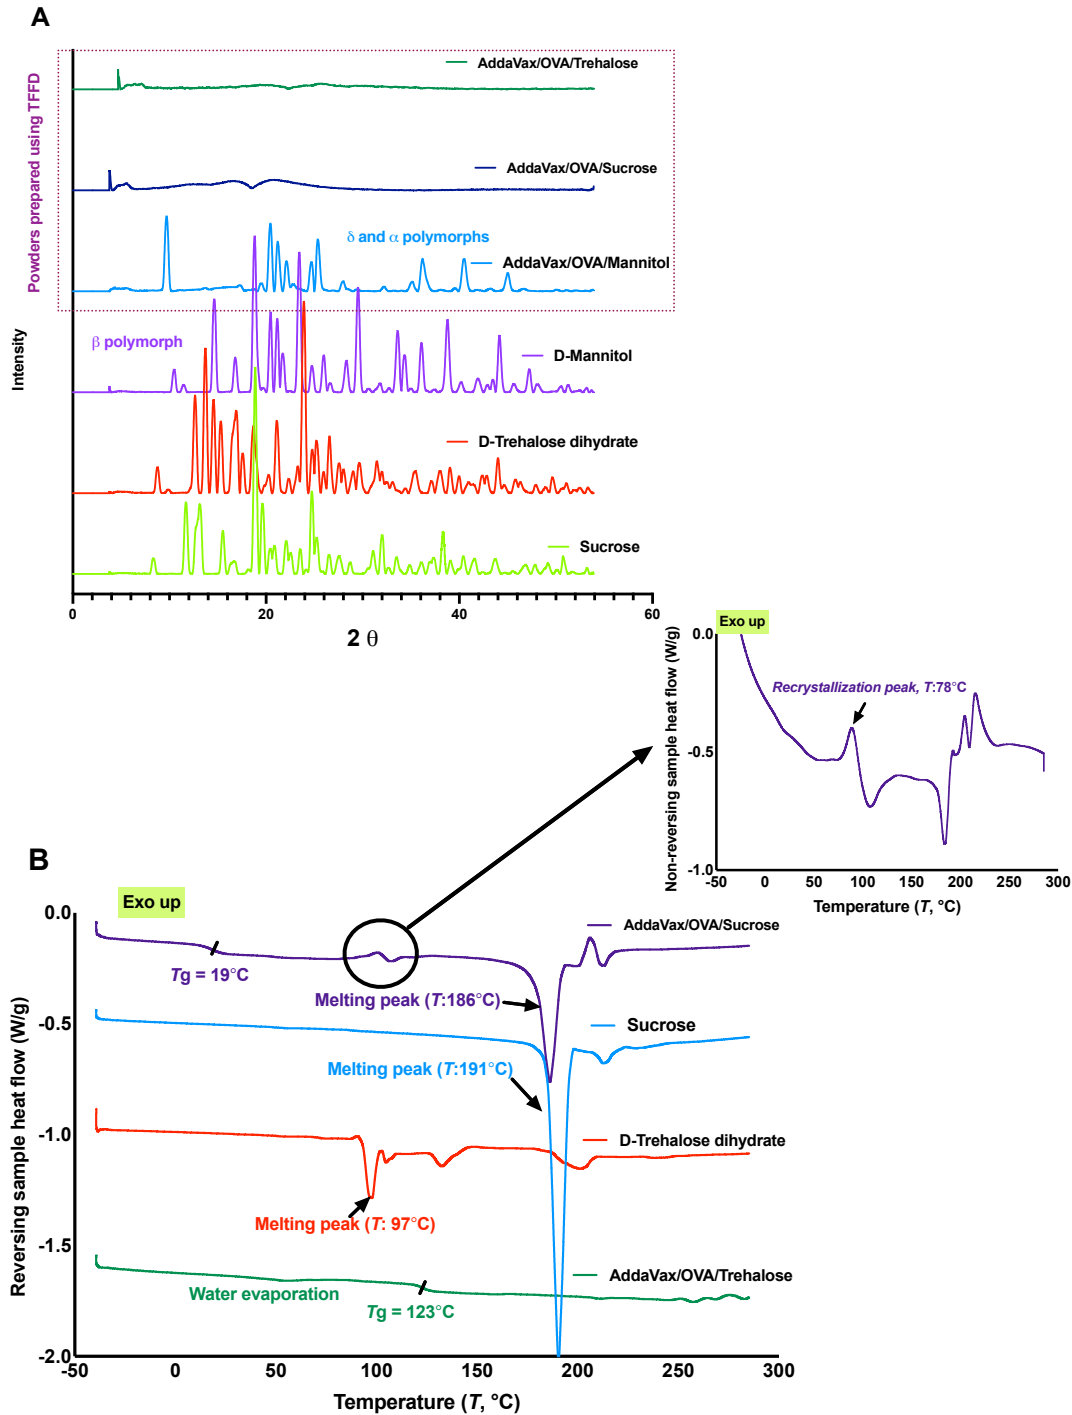

440

441 **Figure 3.** Characterization of AddaVax/OVA dry powders. (A) Powder X-ray diffraction (PXR) patterns of thin-film freeze-dried AddaVax/OVA vaccine powders prepared with sucrose, trehalose or  
442 mannitol as a stabilizer as well as pure stabilizers as controls. (B) DSC thermograms of thin-film freeze-  
443 dried AddaVax/OVA vaccine powders prepared with trehalose (*i.e.*, AddaVax/OVA/Trehalose) or  
444 sucrose (*i.e.*, AddaVax/OVA/Sucrose) as a stabilizer and pure sugars as controls. Inset, the non-  
445 reversing heat flow thermogram of AddaVax/OVA/sucrose showing a recrystallization exothermic  
446 peak of sucrose.  
447

### 448 3.2.2. Effect of freezing process (freezing rate) and repeated freezing and thawing on the particle 449 size of AddaVax/OVA vaccine

450 Shelf freeze-drying had a deleterious effect on the particle size distribution of AddaVax/OVA  
451 vaccine and led to an extra group of particulates in the range of 1000 nm (**Figure 4A-B**). Although the  
452 dry powder of AddaVax/OVA vaccine prepared using TFFD maintained a unimodal particle size  
453 distribution after reconstitution ( $PDI = 0.26 \pm 0.02$ ), vaccine mean particle size increased from  $159 \pm 1$   
454 nm to  $229 \pm 10$  nm ( $p < 0.05$ ). Since the freezing step is considered the most critical step for the integrity  
455 of freeze-dried emulsions [17, 46], the effect of freezing rate on the mean particle size of the vaccine  
456 was investigated. As shown in **Figure 4C-D**, the thin-film freezing step contributed to the increase of  
457 vaccine mean particle size to a smaller extent as compared to the the drying step (by 29 nm vs 41 nm,  
458 respectively,  $p < 0.05$ ). It was reported that coating of the oil droplet surface with trehalose through  
459 hydrogen bonding during the drying step can increase the hydrodynamic particle size by up to 80 nm  
460 [47]. The drying step was also responsible for the increase in the polydispersity index of the vaccine  
461 (**Figure 4E**). On the contrary, the deleterious effect of shelf freeze-drying process on the Z-average  
462 hydrodynamic particle size of the vaccine could be mainly attributed to the freezing step (**Figure 4F**).  
463 Nonetheless, the drying step had also lead to a slight increase of the vaccine hydrodynamic particle size  
464 (**Figure 4F**), likely in part due to coating of the particles in the vaccine by trehalose.

465 The formation of ice crystals during freezing of emulsions can induce the aggregation and/or  
466 fusion of emulsion droplets as a result of surfactant layer aggregation [17, 46]. Additionally, slow  
467 freezing results in large ice crystals and hence larger supercooling effects than fast freezing [48, 49].  
468 Thus, the slow shelf freezing may have resulted in the bimodal particle size distribution in the  
469 AddaVax/OVA powder prepared by shelf freeze-drying. Consequently, we hypothesised that powder  
470 engineering technologies that achieve sufficiently rapid cooling rates can protect the nanoemulsion  
471 droplets against aggregation or fusion. TFF achieves cooling rates (*i.e.*,  $10^2$ - $10^3$  K/s) intermediate  
472 between spray freeze (*i.e.*,  $10^6$  K/s) and conventional shelf freezing (*i.e.*, 0.017 K/s) [25]. The high  
473 freezing rates during TFF result in the formation of small ice crystals and homogenous distribution of  
474 the stabilizing agent [50]. Additionally, the large number of nuclei and thin ice channels formed during  
475 TFF prevent particle growth [26].

476 According to prescribing information, liquid nanoemulsion-adjuvanted vaccines (*e.g.*, Flud  
477 and Flud Quadrivalent) should not be exposed to freezing. They should be discarded if they were  
478 accidentally exposed to a freezing temperature which can be critical in case of pandemics. To test  
479 whether thin-film freeze-dried vaccines containing an nanoemulsion as an adjuvant is sensitive to  
480 freezing, thin-film freeze-dried AddaVax/OVA vaccine powder was subjected to three cycles of  
481 freezing and thawing to test its freezing sensitivity. As illustrated in **Figure 4G**, the mean particle size

482 of the AddaVax/OVA vaccine dry powder was preserved after it was exposed to repeated freezing and  
483 thawing. On the contrary, repeated freezing and thawing of the liquid AddaVax/OVA vaccine resulted  
484 in significant particle aggregation (**Figure 4H**). Freezing results in the formation of a network of  
485 crystalline oil droplets, and the network collapses and droplets undergo coalescence during thawing  
486 [51]. These results demonstrate the benefits of converting vaccines containing nanoemulsions into dry  
487 powders.

488

### 489 **3.2.3. Effect of TFF temperature, antigen, antigen amount and buffer molarity on the particle** 490 **size of AddaVax/OVA vaccine**

491 The applicability of TFFD for converting AddaVax-adjuvanted vaccines containing different  
492 antigens to dry powders was investigated using lysozyme or influenza virus rHA proteins (*i.e.*, Y-2, J-  
493 4 and TJ-5). As shown in **Figure 5A-C**, the Z-average hydrodynamic particle size values of adjuvanted  
494 influenza vaccine candidates and lysozyme model vaccine after subjected to TFFD and subsequent  
495 reconstitution did not significantly increase ( $p>0.05$ ), unlike the AddaVax/OVA vaccine, pointing out  
496 the effect of antigen on the particle size in thin-film freeze-dried AddaVax-adjuvanted vaccines. To test  
497 whether other factors may be adjusted to minimize the increase in the hydrodynamic particle size of the  
498 AddaVax/OVA vaccine after subjected to TFFD, TFF temperature, buffer molarity and antigen amount  
499 were explored. In addition to affecting the freezing rate, the freezing temperature also affects the crystal  
500 growth [50]. Our results showed that the AddaVax/OVA vaccine thin films can be prepared at a wide  
501 range of temperatures without a significant effect on the mean particle size of the vaccine (**Figure 5D**).  
502 Moreover, the buffer molarity and antigen amount did not appear to have any effect on the Z-average  
503 hydrodynamic particle size of AddaVax/OVA vaccine after subjected to TFFD and subsequent  
504 reconstitution (**Figure 5E-F**). Therefore, the vaccine formulation comprising AddaVax (50  $\mu$ L), antigen  
505 (6  $\mu$ g), and trehalose (125 mg/mL) in citrate buffer (2.5 mM, pH 6.5) in 0.1 mL and thin-film frozen at  
506 -100 °C was used for additional studies.

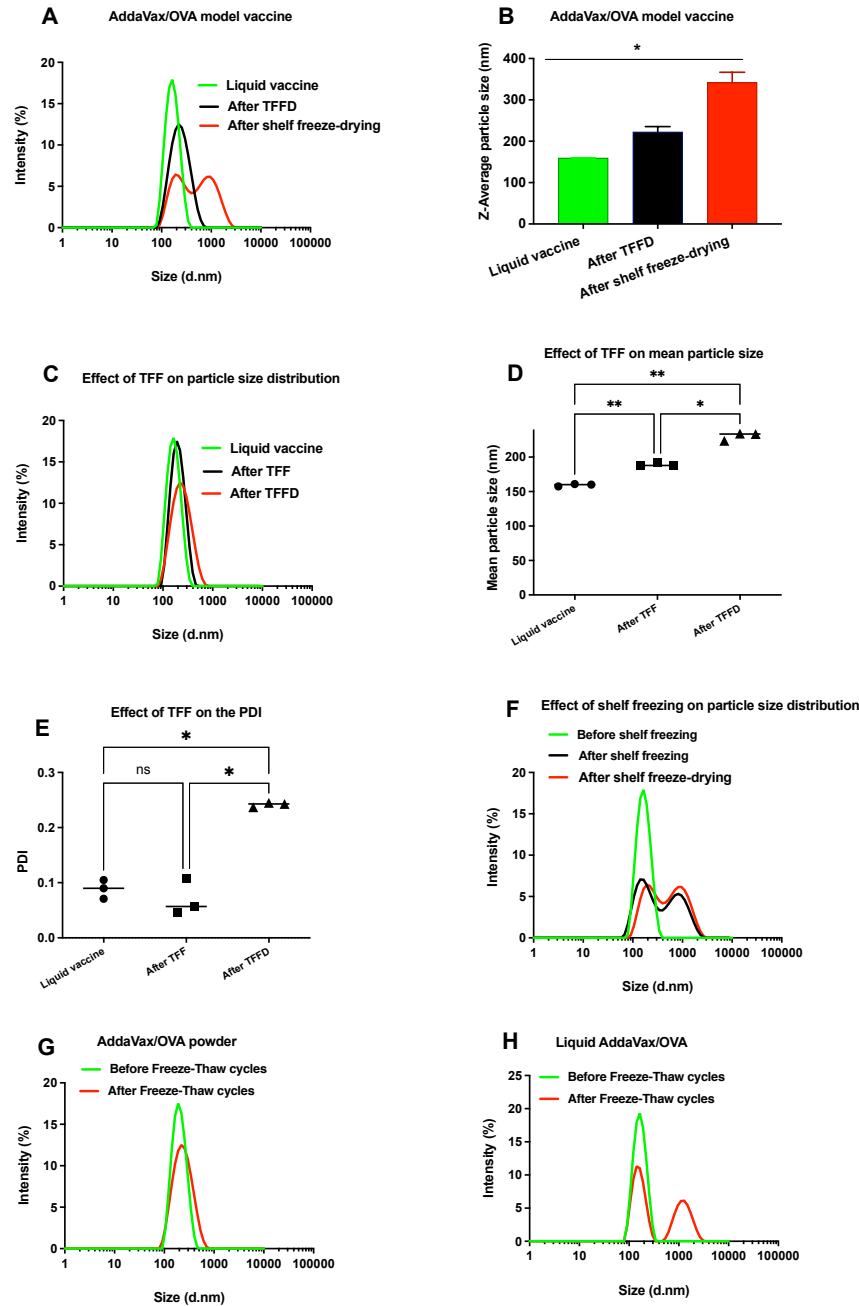

507

508 **Figure 4.** Effect of freezing process (freezing rate) and repeated freezing and thawing on the Z-average  
 509 hydrodynamic particle size of AddaVax/OVA vaccine. (A) Particle size distribution and (B) Z-average  
 510 hydrodynamic particle size of liquid and reconstituted AddaVax/OVA vaccine dry powders prepared  
 511 using shelf freeze-drying or TFFD. (C-E) Effect of TFF on particle size distribution, Z-average  
 512 hydrodynamic particle size and PDI of AddaVax/OVA vaccine. (F) Effect of shelf freezing on particle  
 513 size distribution of AddaVax/OVA vaccine. (G-H) Effect of repeated freezing and thawing on intensity  
 514 particle size distribution of AddaVax/OVA vaccine as a thin-film freeze-dried powder or in liquid.  
 515 \* $p < 0.05$ , \*\* $p < 0.01$ , ns: non-significant ( $p > 0.05$ ).

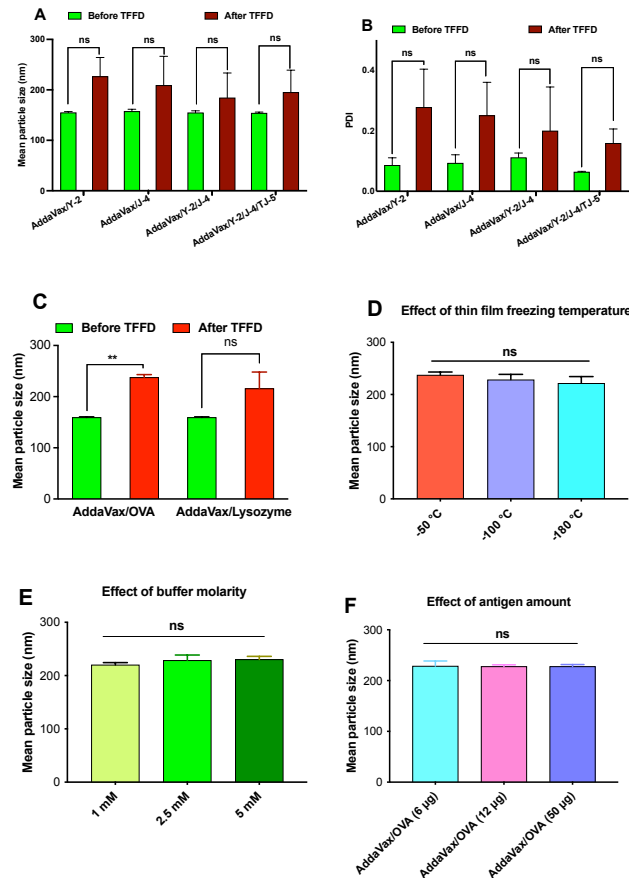

516

517 **Figure 5.** Effect of different antigens, antigen amount, buffer molarities, and thin-film freezing  
 518 temperature on AddaVax-adjuvanted vaccines. (A) Z-average hydrodynamic particle size and (B) PDI  
 519 values of AddaVax-adjuvanted influenza vaccines containing one or more rHA proteins at a total  
 520 amount of 6 µg/100 µL. (C) Z-average hydrodynamic particle size of two model vaccines comprising  
 521 12 µg/100 µL of OVA (*i.e.*, AddaVax/OVA) or lysozyme (*i.e.*, AddaVax/lysozyme) as an antigen. (D)  
 522 The effect of TFF temperature (*i.e.*, drum temperature) on the Z-average hydrodynamic particle size of  
 523 AddaVax/OVA comprising OVA (6 µg/100 µL) was studied at three drum temperatures (*i.e.*, -50, -100,  
 524 and -180°C). (E) The effect of buffer molarity on the Z-average hydrodynamic particle size of  
 525 AddaVax/OVA vaccine (*i.e.*, 1, 2.5 and 5 mM). (F) The influence of antigen amount on the Z-average  
 526 hydrodynamic particle size of AddaVax/OVA vaccine was investigated *with* AddaVax/OVA model  
 527 vaccines with different amounts of OVA (*i.e.*, 6, 12 or 50 µg/100 µL). Trehalose was employed as a  
 528 stabilizer in all vaccine formulations at a concentration of 125 mg/mL. Vaccine formulations were  
 529 frozen into thin films at a drum temperature of -100°C except for (D). Various antigens were loaded in  
 530 the vaccine formulations at an antigen amount of 6 µg/100 µL except for (C) and (F). Formulations  
 531 were prepared in citrate buffer (2.5 mM, pH 6.5) except for (E). \*\* $p < 0.01$ , ns: non-significant ( $p > 0.05$ ).

532

533

### 534 3.3. In vitro characterization of dry powders of AddaVax-adjuvanted influenza rHA vaccines

535 AddaVax/rHA vaccines (*i.e.*, AddaVax/Y-2, AddaVax/J-4, AddaVax/Y-2/J-4, and AddaVax/Y-  
536 2/J-4/TJ-5) were prepared by dissolving one, two or three rHA proteins at a total rHA protein amount  
537 of 6  $\mu\text{g}$  in 50  $\mu\text{L}$  of citrate buffer (2.5 mM, pH 6.5) containing trehalose at a concentration of 250  
538 mg/mL, which was then admixed with AddaVax (50  $\mu\text{L}$ ). The vaccines were thin-film frozen at  $-100^\circ\text{C}$   
539 followed by sublimation to remove water. As shown in **Figures 5A and 6A**, the particle size and zeta  
540 potential values of all AddaVax/rHA vaccines did not significantly change ( $p>0.05$ ) after subjected to  
541 TFFD and subsequent reconstitution. Additionally, subjecting the AddaVax/rHA vaccines to TFFD did  
542 not cause apparent aggregation nor degradation of rHA proteins based on SDS-PAGE data (**Figure 6B**).  
543 Importantly, the hemagglutination activity of the rHA proteins were maintained after the AddaVax/rHA  
544 vaccines were subjected to TFFD (**Figure 6C**). Overall, it appeared that subjecting protein antigens  
545 adjuvanted with AddaVax to TFFD did not compromise the integrity and activity of the antigens.

546

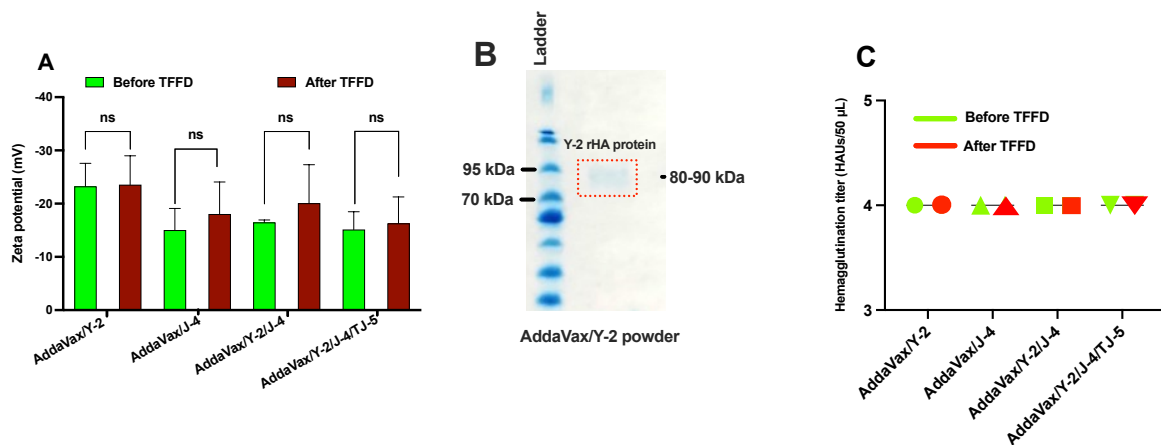

547

548 **Figure 6.** In vitro characterization of AddaVax-adjuvanted influenza rHA vaccines. (A) Zeta potential  
549 values of vaccine candidates determined by DLS. (B) SDS-PAGE analysis of Y-2 rHA proteins  
550 reconstituted from the vaccine dry powders. (C) Hemagglutination titers of various AddaVax/rHA  
551 vaccines before and after they were subjected to TFFD and subsequent reconstitution.  
552 Hemagglutination titer assay was repeated twice with the same results. *ns*: non-significant ( $p>0.05$ ).

553

### 554 3.4. In vivo evaluation of AddaVax-adjuvanted rHA vaccines after subjected to TFFD

555 BALB/c mice were vaccinated twice at 4-week intervals to evaluate the immunogenicity of the  
556 dry powder AddaVax/rHA influenza vaccines, in comparison to the same vaccines that were not  
557 subjected to TFFD. Blood was collected 4 weeks after second vaccination and sera were analyzed for  
558 functional, neutralizing antibody titers against a panel of H1 and H3 viruses. Although mice are widely

559 used for preclinical trials of influenza vaccines, many strains, including BALB/c, do not show disease  
560 symptoms after infection with clinical isolates of H3N2 [52]. For future studies, DBA/2J mice that have  
561 shown to be susceptible to infection by human clinical isolates of influenza will be used [53]. However,  
562 the animal studies demonstrated that the immunogenicity of AddaVax/rHA influenza vaccine dry  
563 powders was maintained and comparable to their liquid counterparts (**Figures 7-8**). Sera from mice that  
564 were not immunized (*i.e.*, Mock group) (**Figure 7A**) or immunized with AddaVax alone (*i.e.*, liquid  
565 AddaVax group) (**Figure 7B**) did not show any hemagglutination inhibition activity. Mice that were  
566 vaccinated with liquid or reconstituted dry powder of AddaVax/Y-2 vaccine candidate (Y-2 is an H1  
567 rHA protein) produced HAI titers against currently circulating H1N1 influenza viruses, but not to pre-  
568 pandemic strains (**Figure 7C-D**). A titer of 1:40 is accepted as a “protective” correlate of protection  
569 [54]. The HAI titers elicited by the liquid or reconstituted dry powder of AddaVax/Y-2 were not  
570 significantly different. Similarly, mice that were immunized with reconstituted dry powder of  
571 AddaVax/J-4 (J-4 is an H3 rHA protein) produced HAI titers against a broad range of H3N2 influenza  
572 viruses (**Figure 7E**). Mice that were immunized with reconstituted dry powder of AddaVax-adjuvanted  
573 influenza vaccine candidates containing both H1 (*i.e.*, Y-2) and H3 (*i.e.*, TJ-5 and/or J-4) rHA proteins  
574 produced HAI titers against a broad range of H3N2 influenza viruses as well as currently circulating  
575 H1N1 influenza viruses (**Figure F-G**). There was also no significant difference between the HAI titers  
576 of reconstituted and liquid AddaVax/Y-2/J-4/TJ-5 vaccines (**Figure 7G vs 7H**), demonstrating that  
577 subjecting the AddaVax/rHA vaccines to TFFD did not affect the HAI activity of the antisera induced  
578 by the vaccines.

579 To determine if the antibodies can block live virus infection, pooled sera from immunized mice  
580 were incubated with H1N1 influenza viruses (**Figure 8A-B**) or H3N2 viruses (**Figure 8C-E**). Then, the  
581 viruses’ ability to infect MDCK-SIAT1 cells was evaluated. Reconstituted dry powder AddaVax/Y-2  
582 vaccine candidate and its liquid counterpart elicited similar neutralizing antibody titers against  
583 A/California/07/2009, though liquid AddaVax/Y-2 vaccine induced higher neutralizing antibody titers  
584 against A/Brisbane/2/2018. Reconstituted dry powder AddaVax/Y-2/J-4/TJ-5 vaccine and its liquid  
585 counterpart elicited similar neutralizing titers against A/Brisbane/2/2018, A/California/07/2009,  
586 A/Singapore-INFIMH-16-0019/2016, and A/Hong Kong/4081/2014, and the reconstituted dry powder  
587 vaccine elicited higher antibody titers to the A/Kansas/14/2017 than its liquid counterpart. Finally, 4  
588 weeks after the second immunization, mice in all groups were intranasally challenged with  
589 A/Kansas/14/2017 (H3N2), but there was not any significant difference among any of the immunized  
590 groups in terms of weight loss (**Figure 3S**).

591 Vaccine particle size has been reported to affect the immunogenicity of the vaccine [18]. Data  
592 in Figures 7 and 8 showed that the slight mean particle size increase of the AddaVax-adjuvanted  
593 influenza vaccines after subjected to TFFD, though not significant, did not adversely affect their

594 immunogenicity in mice, indicating that TFFD is a promising technology for the conversion of MF59-  
 595 like nanoemulsion-adjuvanted vaccines into dry powders.

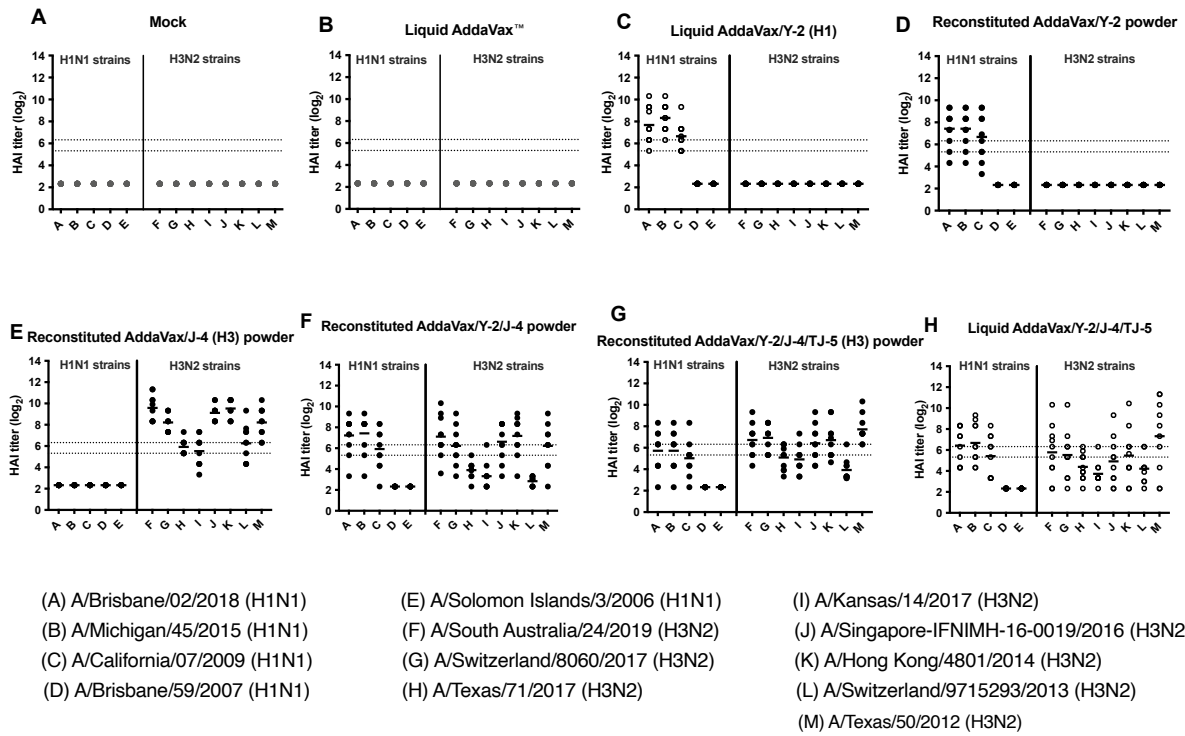

596

597 **Figure 7. HAI serum antibody titers induced by TFFD formulated vaccines in mice.** BALB/c mice  
 598 (n=10) were vaccinated twice at 4-week intervals with AddaVax/rHA influenza vaccine candidates  
 599 formulated as powders by TFFD. Control groups were vaccinated with the liquid formulation  
 600 counterpart, AddaVax only, or mock. HAI titers were determined for individual mice, with mean values  
 601 indicated, 4 weeks after boost. The x-axis represents the viruses used, with H1N1 strains on the left of  
 602 the solid vertical line and H3N2 strains to the right. The bottom and top dashed horizontal lines indicate  
 603 1:40 and 1:80 titer, respectively.

604



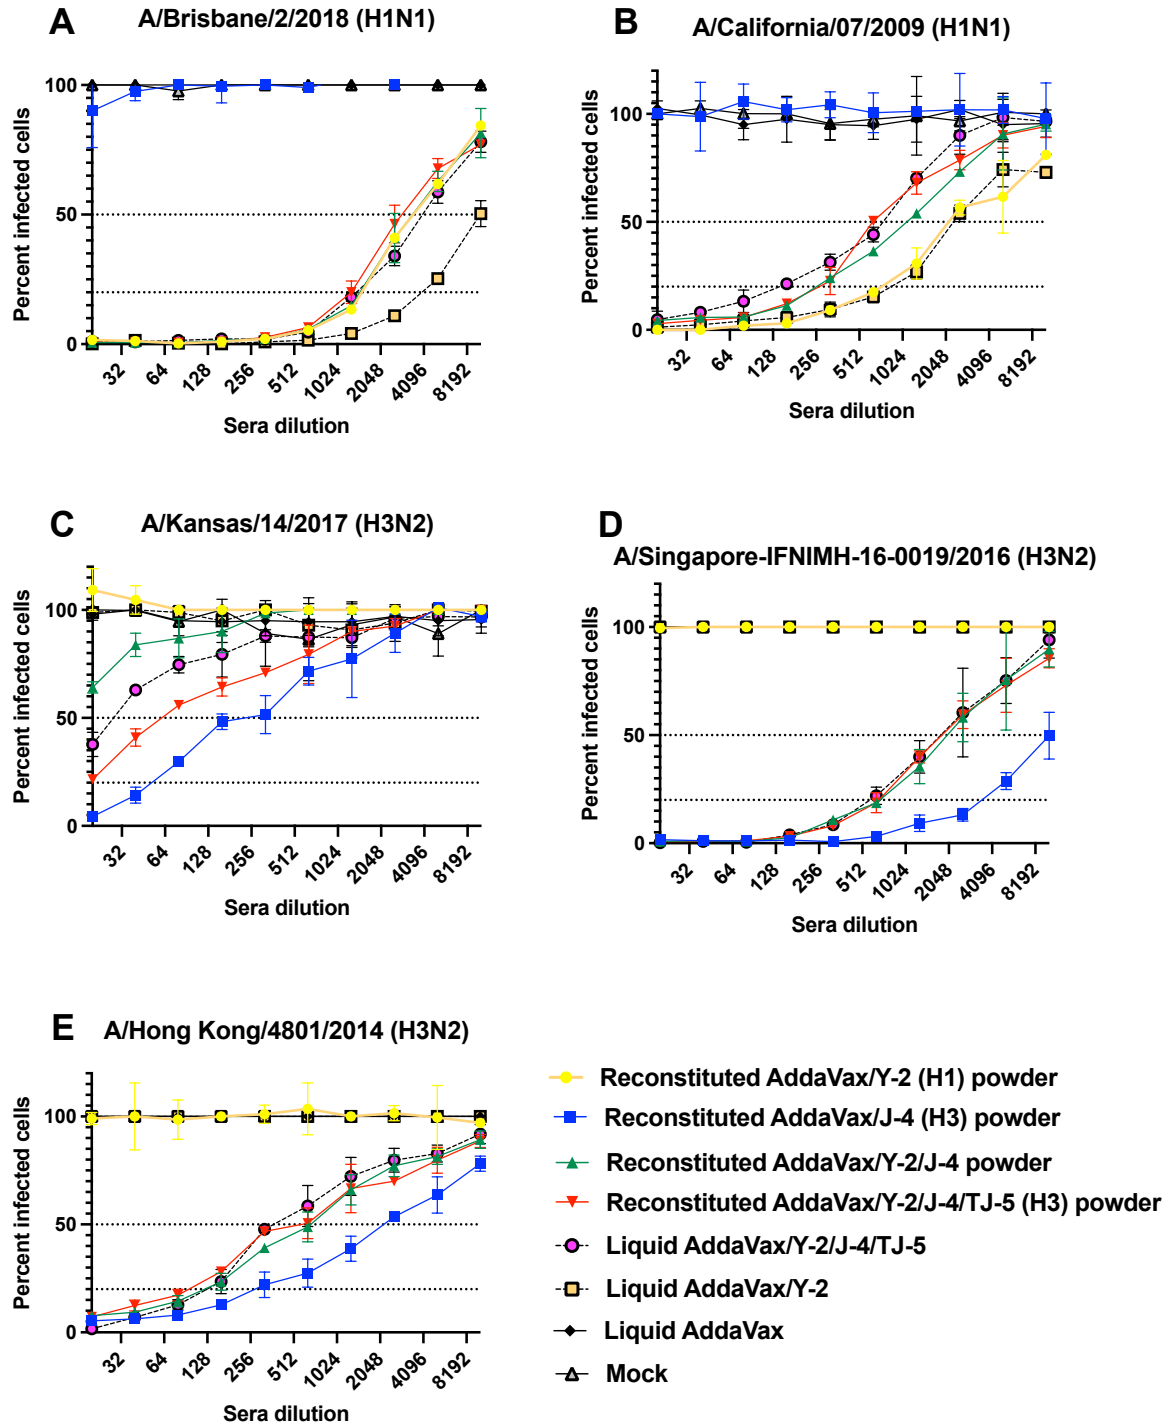

605

606 **Figure 8. Neutralizing antibody titers induced by dry powders of AddaVax/rHA influenza vaccine**

607 **candidates prepared using TFFD.** FRA was done using pooled mouse sera 4 weeks after boost.

608 BALB/c mice were vaccinated twice at 4-week intervals with reconstituted dry powders of

609 AddaVax/rHA, liquid AddaVax/rHA vaccine formulations, reconstituted dry powder of AddaVax

610 prepared by TFFD, or mock. Each graph represents a strain used for FRA against H1N1 (A-B) and

611 H3N2 (C-E) viruses, with vaccine groups indicated on the right. The dotted dash lines represent 50%

612 and 80% inhibition by sera compared to virus-only controls.

### 613 3.5. TFFD of Flud Quadrivalent, an MF59-adjuvanted vaccine

614 Using various antigen and antigen combination, we have showed that TFFD can be applied to  
615 convert vaccines adjuvanted with AddaVax from liquid to dry powder with maintaining the  
616 immunogenicity of the vaccines. To confirm the applicability of TFFD to MF59-adjuvanted vaccines,  
617 commercially available Flud Quadrivalent vaccine that contains MF59 was subjected to TFF at -100  
618 °C and using trehalose at 125 mg/mL as a stabilizer. Upon sublimation and reconstitution, the particle  
619 size, PDI, and zeta potential of the vaccine as well as the integrity and function of the HA antigens in  
620 the vaccine were determined. As shown in **Figures 9A-B**, the particle size and PDI of the reconstituted  
621 vaccine increased slightly, but the zeta potential of the vaccine was maintained (**Figure 9C**). The  
622 hydrodynamic particle size increase can in part be due to the strong interaction of trehalose with the  
623 vaccine upon drying, and it is expected that further composition optimization can help minimize the  
624 size increase. Importantly, the integrity of the antigens (**Figure 9D**) and hemagglutination activity of  
625 the HA antigens in the vaccine (**Figure 9E**) remained unchanged, further confirming that TFFD can be  
626 applied to convert a vaccines adjuvanted with MF59 or AddaVax into dry powders. This is to our  
627 knowledge the first report of formulating an MF59-adjuvanted vaccine into a dry powder. As MF59 is  
628 mainly used in influenza vaccines, this report is an important step towards the development of a stable,  
629 universal influenza vaccine.

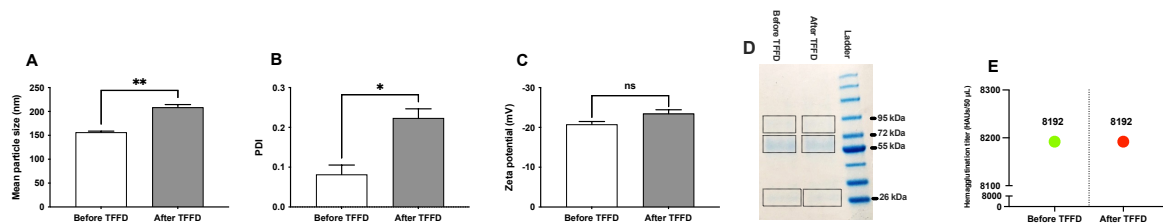

630

631 **Figure 9.** Characterization of Flud Quadrivalent dry powder prepared by TFFD. (A) Mean particle  
632 size, (B) PDI and (C) zeta potential values of liquid vaccine (*i.e.*, before TFFD) and reconstituted dry  
633 powder determined using DLS. (D) SDS-PAGE analysis. (E) Hemagglutination titers in HAU/50 µL.  
634 Hemagglutination was repeated twice (n = 2) with the same results were observed. Flud Quadrivalent  
635 vaccine is adjuvanted with MF59 and contains the HA proteins of four influenza strains at 15 µg/0.5  
636 mL each. Trehalose dissolved in citrate buffer (2.5 mM, pH 6.5) was employed as a stabilizer at final  
637 concentration of 125 mg/mL. Trehalose (50 µL) was mixed with 50 µL of Flud Quadrivalent and then  
638 the liquid vaccine formulation was frozen to thin films at -100°C. The vaccine dry powder was  
639 reconstituted in 100 µL milli-Q water before characterization by DLS. Samples for SDS-PAGE analysis  
640 and hemagglutination assay were reconstituted in 50 µL milli-Q water so that the HA content is 6 µg/50  
641 µL (*i.e.*, 60 g/0.5 mL) to facilitate the analysis. \* $p < 0.05$ , \*\* $p < 0.01$ , ns: non-significant ( $p < 0.05$ ).

642

643

644 **Conclusion**

645 MF59 is a nanoemulsion adjuvant in FDA-approved human influenza vaccines. MF59-  
646 containing vaccines need cold chain for storage and transport, which may be avoided by converting the  
647 vaccines to dry powders. We report that TFFD can be applied to convert AddaVax, a preclinical grade  
648 equivalent of MF59, and vaccines containing MF59 or AddaVax from liquid to dry powders. The extent  
649 to which the particle size can be maintained was dependent on the antigen and the stabilizing  
650 excipient(s) used. Importantly, using monovalent, bivalent, and trivalent rHA antigens against H1  
651 and/or H3 influenza viruses, we showed that subjecting the rHA vaccines adjuvanted with AddaVax to  
652 TFFD did not significantly affect the immunogenicity of the vaccines in a mouse model, pointing to the  
653 potential of developing a universal dry powder flu vaccine.

654

655 **Acknowledgments**

656 This work was in part supported by Sponsored Research Agreements and Technology Validation  
657 Agreements from TFF Pharmaceuticals Inc. (to ROW, ZC, and TMR). KA is supported in part by a  
658 fellowship (GM 1105) from the Egyptian Ministry of Higher Education. TMR is supported, in part, by  
659 the University of Georgia and by the National Institute of Allergy and Infectious Diseases, a component  
660 of the NIH, Department of Health and Human Services, under contract 75N93019C00052. In addition,  
661 TMR is supported by the Georgia Research Alliance as an Eminent Scholar.

662

663 **Conflicts of interest**

664 ZC, ROW, TMR report financial support by TFF Pharmaceuticals, Inc. ZC reports a relationship with  
665 TFF Pharmaceuticals, Inc. that includes: equity or stocks and funding grants. ROW reports a  
666 relationship with TFF Pharmaceuticals, Inc. that includes: consulting or advisory, equity or stocks, and  
667 funding grants. HX, CM, and SS report a relationship with TFF Pharmaceuticals, Inc. that includes:  
668 consulting or advisory. ZC and ROW have a patent “Dry solid aluminum adjuvant-containing vaccines  
669 and related methods thereof” pending to TFF Pharmaceuticals, Inc. ZC, ROW, KA, HX, and CM have  
670 a patent “Dry powder compositions of oil-in-water (O/W) emulsion adjuvanted vaccines” pending to  
671 UT Austin. DJC is a paid consultant for TFF Pharmaceuticals, Inc. TMR is a member of the TFF  
672 Pharmaceuticals, Inc. Scientific Advisory Board.

673

674

675

676 **References**

- 677 [1] D. Kelly, K. Burt, B. Missaghi, L. Barrett, Y. Keynan, K. Fowke, M. Grant, Responses to pandemic  
678 AS03-adjuvanted A/California/07/09 H1N1 influenza vaccine in human immunodeficiency virus-  
679 infected individuals, *BMC Immunol*, 13 (2012) 49.
- 680 [2] M.L. Mbow, E. De Gregorio, N.M. Valiante, R. Rappuoli, New adjuvants for human vaccines, *Curr*  
681 *Opin Immunol*, 22 (2010) 411-416.
- 682 [3] A. Banzhoff, R. Gasparini, F. Laghi-Pasini, T. Staniscia, P. Durando, E. Montomoli, P.L. Capecci,  
683 P. di Giovanni, L. Sticchi, C. Gentile, A. Hilbert, V. Brauer, S. Tilman, A. Podda, MF59-adjuvanted  
684 H5N1 vaccine induces immunologic memory and heterotypic antibody responses in non-elderly and  
685 elderly adults, *PLoS One*, 4 (2009) e4384.
- 686 [4] E.J. Ko, S.M. Kang, Immunology and efficacy of MF59-adjuvanted vaccines, *Hum Vaccin*  
687 *Immunother*, 14 (2018) 3041-3045.
- 688 [5] D.T. O'Hagan, G.S. Ott, E. De Gregorio, A. Seubert, The mechanism of action of MF59 - an innately  
689 attractive adjuvant formulation, *Vaccine*, 30 (2012) 4341-4348.
- 690 [6] S. Calabro, E. Tritto, A. Pezzotti, M. Taccone, A. Muzzi, S. Bertholet, E. De Gregorio, D.T.  
691 O'Hagan, B. Baudner, A. Seubert, The adjuvant effect of MF59 is due to the oil-in-water emulsion  
692 formulation, none of the individual components induce a comparable adjuvant effect, *Vaccine*, 31  
693 (2013) 3363-3369.
- 694 [7] N. Andrews, P. Waight, C.F. Yung, E. Miller, Age-specific effectiveness of an oil-in-water  
695 adjuvanted pandemic (H1N1) 2009 vaccine against confirmed infection in high risk groups in England,  
696 *J Infect Dis*, 203 (2011) 32-39.
- 697 [8] S. Morel, A. Didierlaurent, P. Bourguignon, S. Delhaye, B. Baras, V. Jacob, C. Planty, A. Elouahabi,  
698 P. Harvengt, H. Carlsen, A. Kielland, P. Chomez, N. Garcon, M. Van Mechelen, Adjuvant System  
699 AS03 containing alpha-tocopherol modulates innate immune response and leads to improved adaptive  
700 immunity, *Vaccine*, 29 (2011) 2461-2473.
- 701 [9] V. Iyer, C. Cayatte, B. Guzman, K. Schneider-Ohrum, R. Matuszak, A. Snell, G.M. Rajani, M.P.  
702 McCarthy, B. Muralidhara, Impact of formulation and particle size on stability and immunogenicity of  
703 oil-in-water emulsion adjuvants, *Hum Vaccin Immunother*, 11 (2015) 1853-1864.
- 704 [10] G. Galli, K. Hancock, K. Hoschler, J. DeVos, M. Praus, M. Bardelli, C. Malzone, F. Castellino, C.  
705 Gentile, T. McNally, G. Del Giudice, A. Banzhoff, V. Brauer, E. Montomoli, M. Zambon, J. Katz, K.  
706 Nicholson, I. Stephenson, Fast rise of broadly cross-reactive antibodies after boosting long-lived human  
707 memory B cells primed by an MF59 adjuvanted prepandemic vaccine, *Proc Natl Acad Sci U S A*, 106  
708 (2009) 7962-7967.
- 709 [11] P. Hallberg, H. Smedje, N. Eriksson, H. Kohnke, M. Daniilidou, I. Öhman, Q.Y. Yue, M. Cavalli,  
710 C. Wadelius, P.K.E. Magnusson, A.M. Landtblom, M. Wadelius, Pandemrix-induced narcolepsy is  
711 associated with genes related to immunity and neuronal survival, *EBioMedicine*, 40 (2019) 595-604.

- 712 [12] D.M. Matthias, J. Robertson, M.M. Garrison, S. Newland, C. Nelson, Freezing temperatures in the  
713 vaccine cold chain: a systematic literature review, *Vaccine*, 25 (2007) 3980-3986.
- 714 [13] K. AboulFotouh, Z. Cui, R.O. Williams, 3rd, Next-Generation COVID-19 Vaccines Should Take  
715 Efficiency of Distribution into Consideration, *AAPS PharmSciTech*, 22 (2021) 126.
- 716 [14] Y. Zhang, D.A. Davis, K. AboulFotouh, J. Wang, D. Williams, A. Bhambhani, M. Zakrewsky, M.  
717 Maniruzzaman, Z. Cui, R.O. Williams, 3rd, Novel formulations and drug delivery systems to administer  
718 biological solids, *Adv Drug Deliv Rev*, 172 (2021) 183-210.
- 719 [15] V. Iyer, C. Cayatte, J.D. Marshall, J. Sun, K. Schneider-Ohrum, S.K. Maynard, G.M. Rajani, A.S.  
720 Bennett, R.L. Remmele, Jr., S.M. Bishop, M.P. McCarthy, B.K. Muralidhara, Feasibility of Freeze-  
721 Drying Oil-in-Water Emulsion Adjuvants and Subunit Proteins to Enable Single-Vial Vaccine Drug  
722 Products, *J Pharm Sci*, 106 (2017) 1490-1498.
- 723 [16] D. Guzey, D.J. McClements, Formation, stability and properties of multilayer emulsions for  
724 application in the food industry, *Adv Colloid Interface Sci*, 128-130 (2006) 227-248.
- 725 [17] A.R. Morais, N. Alencar Edo, F.H. Xavier Junior, C.M. de Oliveira, H.R. Marcelino, G. Barratt,  
726 H. Fessi, E.S. do Egito, A. Elaissari, Freeze-drying of emulsified systems: A review, *Int J Pharm*, 503  
727 (2016) 102-114.
- 728 [18] M.T. Orr, R.M. Kramer, L.t. Barnes, Q.M. Dowling, A.L. Desbien, E.A. Beebe, J.D. Laurance,  
729 C.B. Fox, S.G. Reed, R.N. Coler, T.S. Vedvick, Elimination of the cold-chain dependence of a  
730 nanoemulsion adjuvanted vaccine against tuberculosis by lyophilization, *J Control Release*, 177 (2014)  
731 20-26.
- 732 [19] R.M. Kramer, M.C. Archer, M.T. Orr, N. Dubois Cauwelaert, E.A. Beebe, P.D. Huang, Q.M.  
733 Dowling, A.M. Schwartz, D.M. Fedor, T.S. Vedvick, C.B. Fox, Development of a thermostable  
734 nanoemulsion adjuvanted vaccine against tuberculosis using a design-of-experiments approach, *Int J*  
735 *Nanomedicine*, 13 (2018) 3689-3711.
- 736 [20] T.L. Oliveira, R.A. Schuch, G.R. Inda, B.C. Roloff, A. Neto, M. Amaral, O.A. Dellagostin, D.D.  
737 Hartwig, LemA and Erp Y-like recombinant proteins from *Leptospira interrogans* protect hamsters from  
738 challenge using AddaVax™ as adjuvant, *Vaccine*, 36 (2018) 2574-2580.
- 739 [21] C.Y. Wu, C.Y. Chang, H.H. Ma, C.W. Wang, Y.T. Chen, P.W. Hsiao, C.C. Chang, C.H. Chan,  
740 C.C. Liu, J.R. Chen, Squalene-adjuvanted H7N9 virus vaccine induces robust humoral immune  
741 response against H7N9 and H7N7 viruses, *Vaccine*, 32 (2014) 4485-4494.
- 742 [22] K. AboulFotouh, Y. Zhang, M. Maniruzzaman, R.O. Williams, 3rd, Z. Cui, Amorphous solid  
743 dispersion dry powder for pulmonary drug delivery: Advantages and challenges, *Int J Pharm*, 587  
744 (2020) 119711.
- 745 [23] X. Li, S.G. Thakkar, T.B. Ruwona, R.O. Williams, 3rd, Z. Cui, A method of lyophilizing vaccines  
746 containing aluminum salts into a dry powder without causing particle aggregation or decreasing the  
747 immunogenicity following reconstitution, *J Control Release*, 204 (2015) 38-50.

- 748 [24] J.L. Wang, M.S. Hanafy, H. Xu, J. Leal, Y. Zhai, D. Ghosh, R.O. Williams Iii, H. David Charles  
749 Smyth, Z. Cui, Aerosolizable siRNA-encapsulated solid lipid nanoparticles prepared by thin-film  
750 freeze-drying for potential pulmonary delivery, *Int J Pharm*, 596 (2021) 120215.
- 751 [25] J.D. Engstrom, E.S. Lai, B.S. Ludher, B. Chen, T.E. Milner, R.O. Williams, 3rd, G.B. Kitto, K.P.  
752 Johnston, Formation of stable submicron protein particles by thin film freezing, *Pharm Res*, 25 (2008)  
753 1334-1346.
- 754 [26] S. Hufnagel, S. Sahakijpijarn, C. Moon, Z. Cui, R.O. Williams Iii, The Development of Thin-film  
755 Freezing and Its Application to Improve Delivery of Biologics as Dry Powder Aerosols, *KONA Powder  
756 and Particle Journal*, adpub (2022).
- 757 [27] H. Xu, T. Bhowmik, K. Gong, T.N.A. Huynh, R.O. Williams, Z. Cui, Thin-film freeze-drying of  
758 a bivalent Norovirus vaccine while maintaining the potency of both antigens, *International Journal of  
759 Pharmaceutics*, 609 (2021) 121126.
- 760 [28] A.S. Monto, K. Fukuda, Lessons From Influenza Pandemics of the Last 100 Years, *Clin Infect Dis*,  
761 70 (2020) 951-957.
- 762 [29] G.A. Sautto, G.A. Kirchenbaum, J.W. Ecker, A.G. Bebin-Blackwell, S.R. Pierce, T.M. Ross,  
763 Elicitation of Broadly Protective Antibodies following Infection with Influenza Viruses Expressing  
764 H1N1 Computationally Optimized Broadly Reactive Hemagglutinin Antigens, *Immunohorizons*, 2  
765 (2018) 226-237.
- 766 [30] T.M. Wong, J.D. Allen, A.G. Bebin-Blackwell, D.M. Carter, T. Alefantis, J. DiNapoli, H.  
767 Kleanthous, T.M. Ross, Computationally Optimized Broadly Reactive Hemagglutinin Elicits  
768 Hemagglutination Inhibition Antibodies against a Panel of H3N2 Influenza Virus Cocirculating  
769 Variants, *J Virol*, 91 (2017).
- 770 [31] E.D. Mandon, A. Pizzorno, A. Traversier, A. Champagne, M.E. Hamelin, B. Lina, G. Boivin, E.  
771 Dejean, M. Rosa-Calatrava, A. Jawhari, Novel calixarene-based surfactant enables low dose split  
772 inactivated vaccine protection against influenza infection, *Vaccine*, 38 (2020) 278-287.
- 773 [32] W.H. Organization, Manual for the laboratory diagnosis and virological surveillance of influenza,  
774 World Health Organization, 2011.
- 775 [33] J.D. Allen, H. Jang, J. DiNapoli, H. Kleanthous, T.M. Ross, Elicitation of Protective Antibodies  
776 against 20 Years of Future H3N2 Cocirculating Influenza Virus Variants in Ferrets Preimmune to  
777 Historical H3N2 Influenza Viruses, *J Virol*, 93 (2019).
- 778 [34] A.R. Morais, N. Alencar Édo, F.H. Xavier Júnior, C.M. de Oliveira, H.R. Marcelino, G. Barratt,  
779 H. Fessi, E.S. do Egito, A. Elaissari, Freeze-drying of emulsified systems: A review, *Int J Pharm*, 503  
780 (2016) 102-114.
- 781 [35] J.M. Srinivasan, L.A. Wegiel, L.M. Hardwick, S.L. Nail, The Influence of Mannitol Hemihydrate  
782 on the Secondary Drying Dynamics of a Protein Formulation: A Case Study, *J Pharm Sci*, 106 (2017)  
783 3583-3590.

- 784 [36] W. Abdelwahed, G. Degobert, S. Stainmesse, H. Fessi, Freeze-drying of nanoparticles:  
785 formulation, process and storage considerations, *Adv Drug Deliv Rev*, 58 (2006) 1688-1713.
- 786 [37] M.O. Jara, Z.N. Warnken, S. Sahakijpijarn, C. Moon, E.Y. Maier, D.J. Christensen, J.J. Koleng,  
787 J.I. Peters, S.D. Hackman Maier, R.O. Williams Iii, Niclosamide inhalation powder made by thin-film  
788 freezing: Multi-dose tolerability and exposure in rats and pharmacokinetics in hamsters, *Int J Pharm*,  
789 603 (2021) 120701.
- 790 [38] A. Hawe, W. Friess, Impact of freezing procedure and annealing on the physico-chemical  
791 properties and the formation of mannitol hydrate in mannitol-sucrose-NaCl formulations, *Eur J Pharm*  
792 *Biopharm*, 64 (2006) 316-325.
- 793 [39] P. Sundaramurthi, R. Suryanarayanan, Trehalose Crystallization During Freeze-Drying:  
794 Implications On Lyoprotection, *The Journal of Physical Chemistry Letters*, 1 (2010) 510-514.
- 795 [40] S. Jena, R. Suryanarayanan, A. Aksan, Mutual Influence of Mannitol and Trehalose on  
796 Crystallization Behavior in Frozen Solutions, *Pharm Res*, 33 (2016) 1413-1425.
- 797 [41] M. Gomez, J. McCollum, H. Wang, M. Ordoubadi, C. Jar, N.B. Carrigy, D. Barona, I. Tetreau, M.  
798 Archer, A. Gerhardt, C. Press, C.B. Fox, R.M. Kramer, R. Vehring, Development of a formulation  
799 platform for a spray-dried, inhalable tuberculosis vaccine candidate, *Int J Pharm*, 593 (2021) 120121.
- 800 [42] P. Sundaramurthi, R. Suryanarayanan, Influence of crystallizing and non-crystallizing cosolutes  
801 on trehalose crystallization during freeze-drying, *Pharm Res*, 27 (2010) 2384-2393.
- 802 [43] M.G. Fakes, M.V. Dali, T.A. Haby, K.R. Morris, S.A. Varia, A.T. Serajuddin, Moisture sorption  
803 behavior of selected bulking agents used in lyophilized products, *PDA J Pharm Sci Technol*, 54 (2000)  
804 144-149.
- 805 [44] T.H. Jin, E. Tsao, J. Goudsmit, V. Dheenadhayalan, J. Sadoff, Stabilizing formulations for  
806 inhalable powders of an adenovirus 35-vectored tuberculosis (TB) vaccine (AERAS-402), *Vaccine*, 28  
807 (2010) 4369-4375.
- 808 [45] K.D. Roe, T.P. Labuza, Glass transition and crystallization of amorphous trehalose-sucrose  
809 mixtures, *Int J Food Prop*, 8 (2005) 559-574.
- 810 [46] W. Wang, Lyophilization and development of solid protein pharmaceuticals, *Int J Pharm*, 203  
811 (2000) 1-60.
- 812 [47] D. Christensen, C. Foged, I. Rosenkrands, H.M. Nielsen, P. Andersen, E.M. Agger, Trehalose  
813 preserves DDA/TDB liposomes and their adjuvant effect during freeze-drying, *Bba-Biomembranes*,  
814 1768 (2007) 2120-2129.
- 815 [48] X. Tang, M.J. Pikal, Design of freeze-drying processes for pharmaceuticals: practical advice,  
816 *Pharm Res*, 21 (2004) 191-200.
- 817 [49] S. Jiang, S.L. Nail, Effect of process conditions on recovery of protein activity after freezing and  
818 freeze-drying, *Eur J Pharm Biopharm*, 45 (1998) 249-257.
- 819 [50] P.T. Ingvarsson, M. Yang, H.M. Nielsen, J. Rantanen, C. Foged, Stabilization of liposomes during  
820 drying, *Expert Opin Drug Deliv*, 8 (2011) 375-388.

- 821 [51] G.L. Cramp, A.M. Docking, S. Ghosh, J.N. Coupland, On the stability of oil-in-water emulsions  
822 to freezing, *Food Hydrocolloid*, 18 (2004) 899-905.
- 823 [52] H.T. Groves, J.U. McDonald, P. Langat, E. Kinnear, P. Kellam, J. McCauley, J. Ellis, C.  
824 Thompson, R. Elderfield, L. Parker, W. Barclay, J.S. Tregoning, Mouse Models of Influenza Infection  
825 with Circulating Strains to Test Seasonal Vaccine Efficacy, *Front Immunol*, 9 (2018) 126.
- 826 [53] N. Pica, A. Iyer, I. Ramos, N.M. Bouvier, A. Fernandez-Sesma, A. García-Sastre, A.C. Lowen, P.  
827 Palese, J. Steel, The DBA.2 mouse is susceptible to disease following infection with a broad, but  
828 limited, range of influenza A and B viruses, *J Virol*, 85 (2011) 12825-12829.
- 829 [54] R.J. Cox, Correlates of protection to influenza virus, where do we go from here?, *Hum Vaccin*  
830 *Immunother*, 9 (2013) 405-408.

831

832

833

834

835

836

837

838

839
